# Supplementary material
Source: PubMed Central journal article supplement (PMC5493935)
Supplement: NIHMS869273-supplement-SI.pdf [file NIHMS869273-supplement-SI.pdf]

# **Chromophoric Nucleoside Analogs: Synthesis and Characterization of 6-Aminouracil-Based Nucleodyes**

Noam S. Freeman, Curtis E. Moore, L. Marcus Wilhelmsson and Yitzhak Tor\*

Department of Chemistry and Biochemistry, University of California, San Diego, La Jolla, California 92093-0358, United States

E-mail: ytor@ucsd.edu

## **Supporting Information**

### **Table of Contents**

|                                |     |
|--------------------------------|-----|
| Supporting figures.....        | S2  |
| X-ray crystal structures ..... | S7  |
| NMRs.....                      | S18 |

## Supporting figures

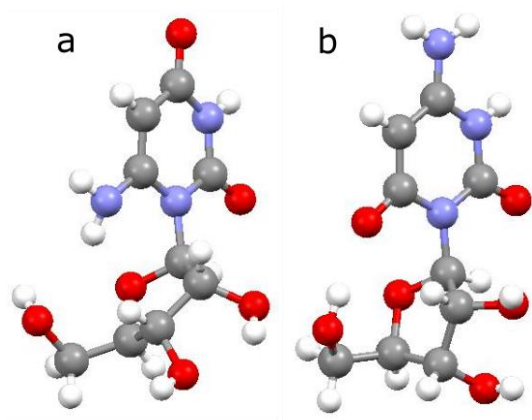

**Figure S1.** Crystal structures of (a) 6-aminouridine (**4**) and (b) 6-oxocytidine (**7**).

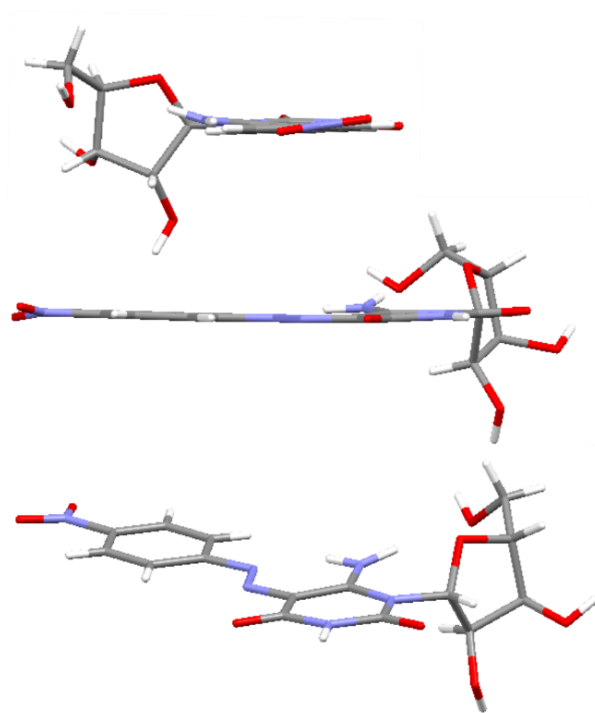

**Figure S2.** Side view images of the crystal structure of 6-amino-5-(4-nitrophenylazo) uridine (**5**).

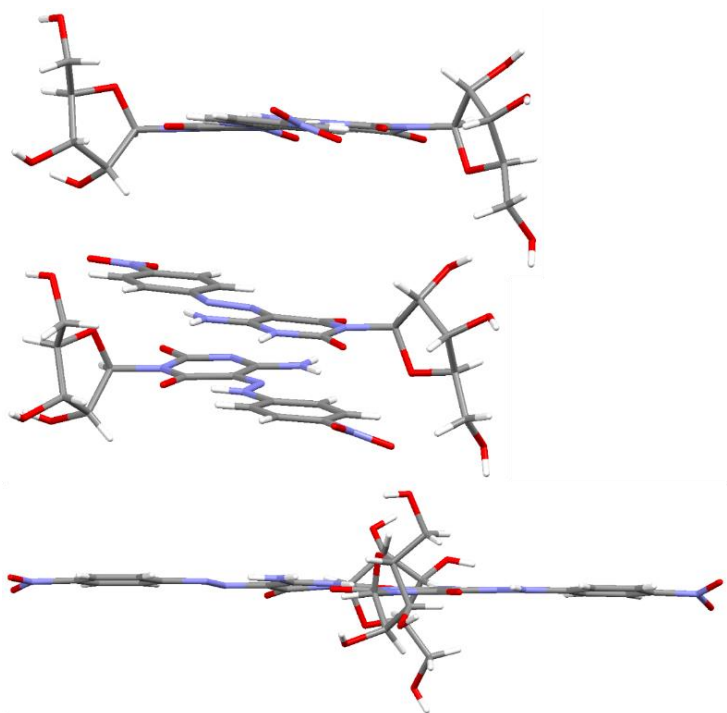

**Figure S3.** Side view images of the crystal structure of 5-(4-nitrophenylazo)-6-oxocytidine (**8**).

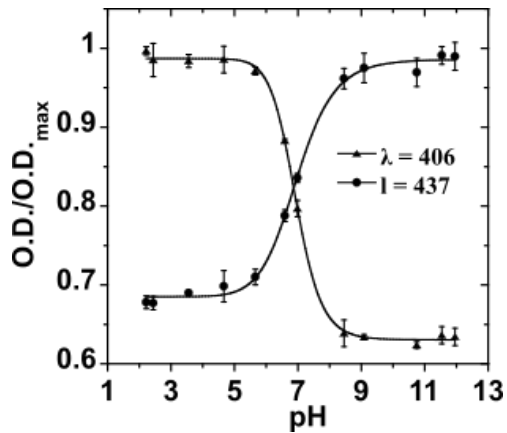

**Figure S4.** Correlation of optical density values to pH at Gaussian maxima  $\lambda = 406$  nm (red) and  $\lambda = 437$  nm (blue) for 5-(4-nitrophenylazo)-6-oxocytidine (**8**) give a slightly lower value than the wavelength maxima correlation indicating the transition at neutral pH ( $pK_{a1} = 7.0 \pm 0.1$ ).

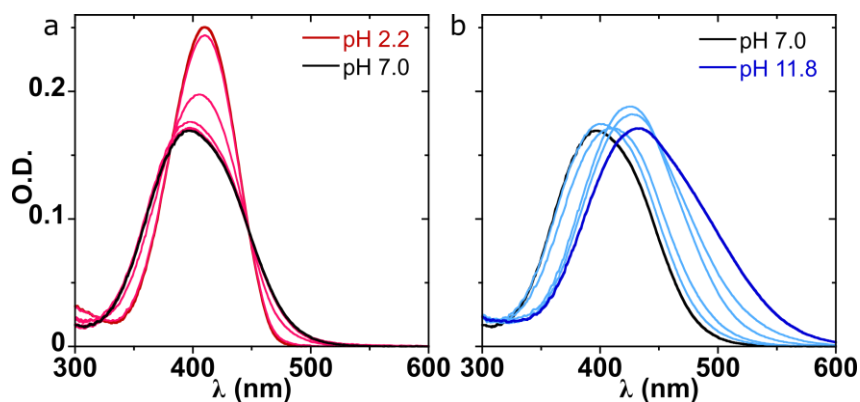

**Figure S5.** Split Figure 3a. Absorption spectra as function of pH for 6-amino-5-(4-nitrophenylazo) uridine **5** ( $5.9 \times 10^{-6}$  M). (a) pH 2.2 – 7.0 ( $pK_{a1} = 3.9 \pm 0.2$ ). (b) pH 7.0 – 11.8 ( $pK_{a2} = 8.8 \pm 0.1$ ).

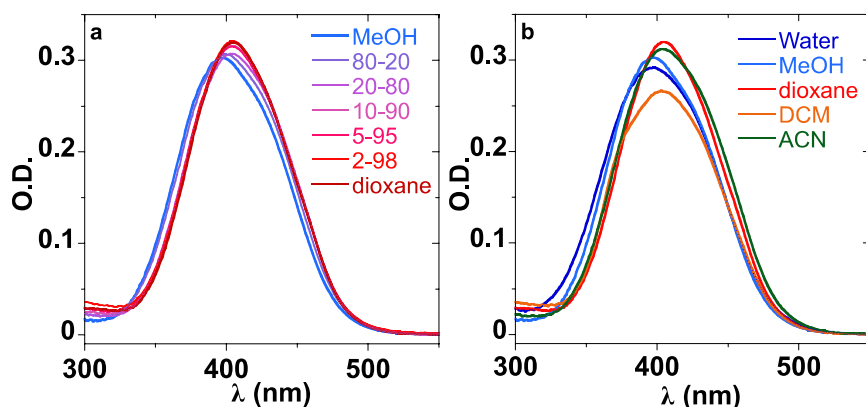

**Figure S6.** Absorption spectra as function of polarity for 6-amino-5-(4-nitrophenylazo) uridine (**5**,  $1 \times 10^{-5}$  M). (a) MeOH–dioxane solutions; (b) pure solvents.

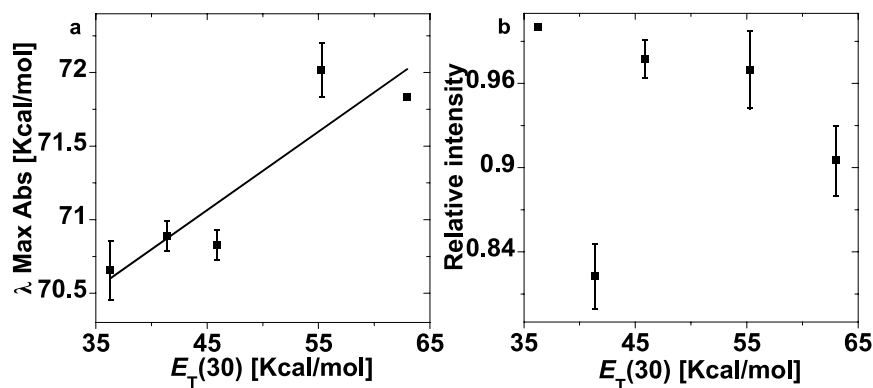

**Figure S7.** Assessing the effect of solvent polarity on absorption of **5** in pure solvents. (a) Correlation of absorption wavelength maxima and (b) absorption intensity (at the wavelength maxima) with  $E_T(30)$  values. The dramatic decrease in intensity (-18%) measured in pure DCM ( $E_T(30) = 41.4$  Kcal/mol) is likely due to solvent specific effects.

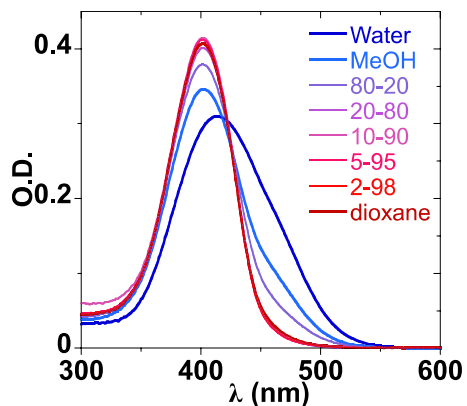

**Figure S8.** Absorption spectra as function of polarity for 5-(4-nitrophenylazo)-6-oxocytidine (**8**,  $9 \times 10^{-6}$  M) measured in MeOH–dioxane solutions. Absorption spectra in water (dark blue) displays a notable 10 nm bathochromic shift.

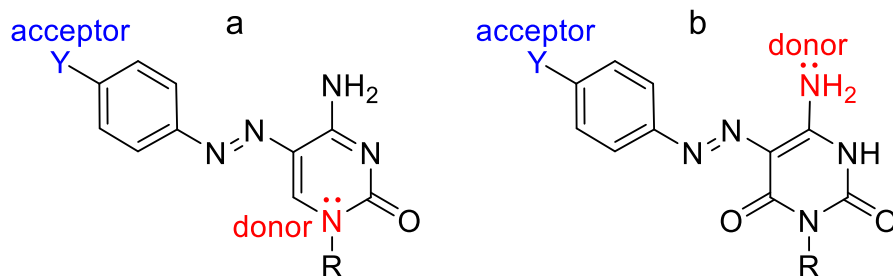

**Figure S9.** Design strategy for (a) cytidine and (b) 6-oxocytidine azo nucleodyes. R = ribofuranose or 2'-dexyribofuranose.

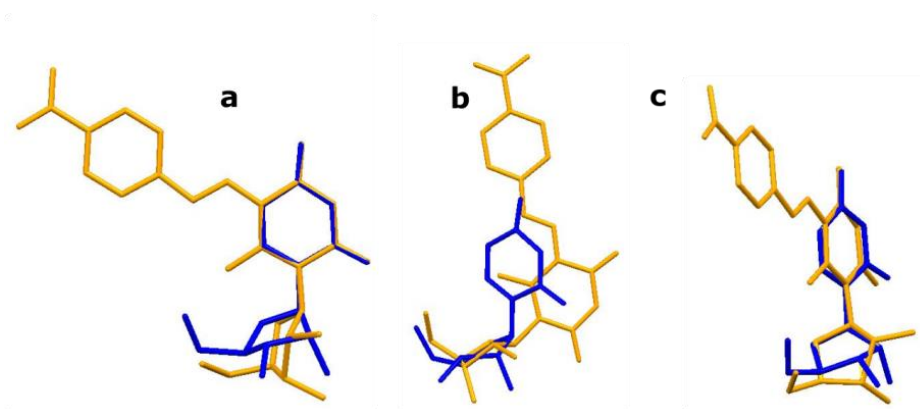

**Figure S10.** Overlap of uridine and 6-amino-5-(4-nitrophenylazo) uridine (**5**). a. pyrimidine core; b. sugar pucker; c. sugar and nucleobase.

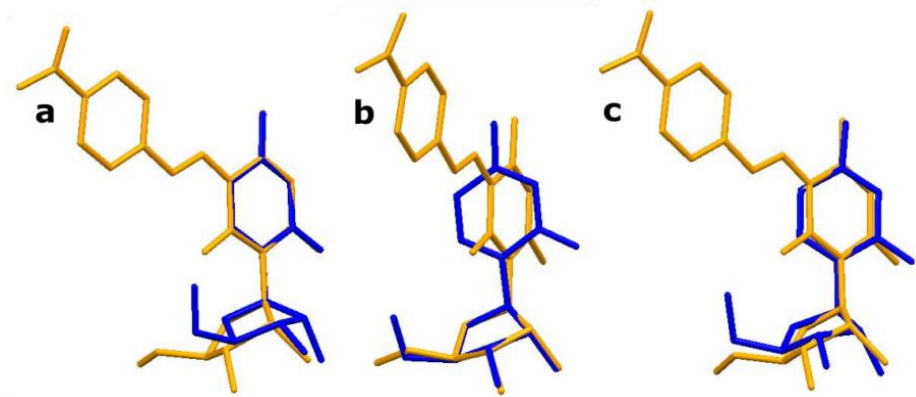

**Figure S11.** Overlap of cytidine and 5-(4-nitrophenylhydrazono)-6-oxocytidine (**8b**). a. pyrimidine core; b. sugar pucker; c. sugar and nucleobase.

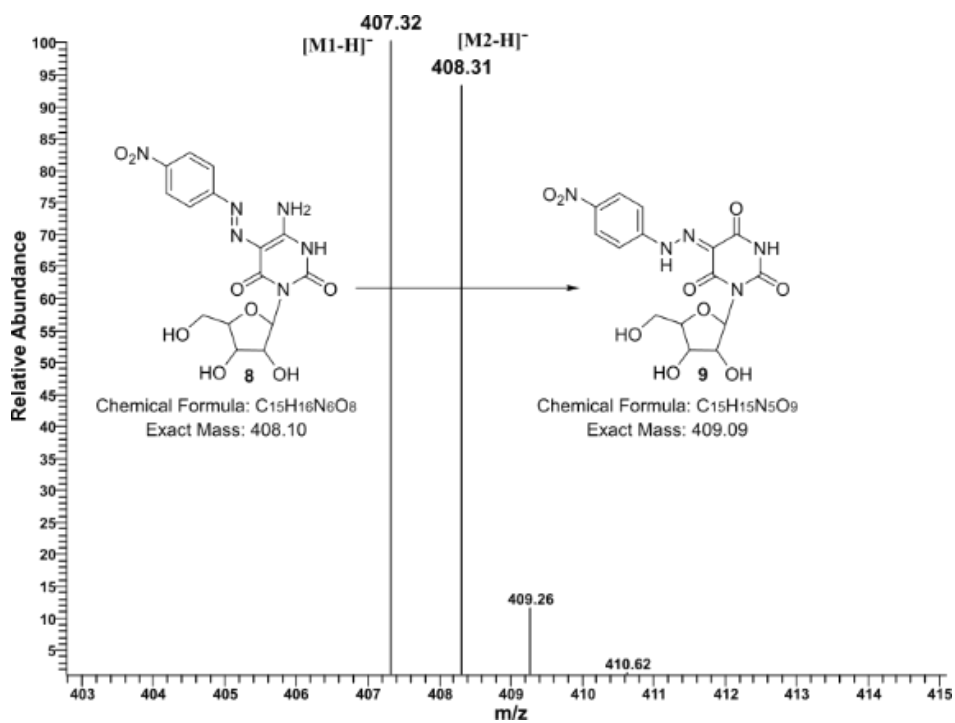

**Figure S12.** LR-MS analysis of crystallization solution gave the masses of both 5-(4-nitrophenylazo)-6-oxocytidine (**8**) and 5-(4-nitrophenylhydrazono)-6-oxouridine (**9**).

## X-ray crystal structures

The single crystal X-ray diffraction studies were carried out on a single crystal diffractometer equipped with Cu K $\alpha$  radiation ( $\lambda = 1.5478$ ) and a Charge-Coupled-Device (CCD) Detector. Crystals were mounted on a Cryoloop with Paratone oil. Data were collected in a nitrogen gas stream at 100(2) K using  $\phi$  and  $\omega$  scans. The data were integrated using the Bruker SAINT software program and scaled using the SADABS software program. Solution by direct methods (SHELXT) produced a complete phasing model consistent with the proposed structure. All nonhydrogen atoms were refined anisotropically by full-matrix least-squares (SHELXL-2014). All hydrogen atoms were placed using a riding model. Their positions were constrained relative to their parent atom using the appropriate HFIX command in SHELXL-2014. All other hydrogen atoms (H-bonding) were located in the difference map. Their relative positions were restrained using DFIX commands and their thermals freely refined. Crystallographic data are summarized in Tables S1–S5.

**Table S1.** Crystal data and structure refinement for Tor100, 6-aminouridine (**4**), CCDC 1437719.

|                                 |                                                              |                             |
|---------------------------------|--------------------------------------------------------------|-----------------------------|
| Identification code             | NF-218                                                       |                             |
| Empirical formula               | C <sub>9</sub> H <sub>13</sub> N <sub>3</sub> O <sub>6</sub> |                             |
| Formula weight                  | 259.22                                                       |                             |
| Temperature                     | 100.0 K                                                      |                             |
| Wavelength                      | 1.54178 Å                                                    |                             |
| Crystal system                  | Monoclinic                                                   |                             |
| Space group                     | P 1 21 1                                                     |                             |
| Unit cell dimensions            | a = 7.0881(3) Å                                              | $\alpha = 90^\circ$ .       |
|                                 | b = 6.6887(3) Å                                              | $\beta = 96.219(2)^\circ$ . |
|                                 | c = 11.6839(6) Å                                             | $\gamma = 90^\circ$ .       |
| Volume                          | 550.68(4) Å <sup>3</sup>                                     |                             |
| Z                               | 2                                                            |                             |
| Density (calculated)            | 1.563 Mg/m <sup>3</sup>                                      |                             |
| Absorption coefficient          | 1.148 mm <sup>-1</sup>                                       |                             |
| F(000)                          | 272                                                          |                             |
| Crystal size                    | 0.167 x 0.113 x 0.095 mm <sup>3</sup>                        |                             |
| Theta range for data collection | 3.805 to 68.031°.                                            |                             |
| Index ranges                    | -8 <= h <= 8, -8 <= k <= 8, -14 <= l <= 13                   |                             |
| Reflections collected           | 17032                                                        |                             |
| Independent reflections         | 1962 [R(int) = 0.0344]                                       |                             |
| Completeness to theta = 68.000° | 97.6 %                                                       |                             |
| Absorption correction           | Semi-empirical from equivalents                              |                             |
| Max. and min. transmission      | 0.1665 and 0.0631                                            |                             |
| Refinement method               | Full-matrix least-squares on F <sup>2</sup>                  |                             |

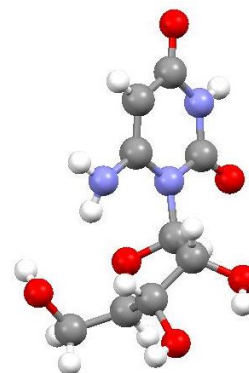

|                                   |                                    |
|-----------------------------------|------------------------------------|
| Data / restraints / parameters    | 1962 / 7 / 187                     |
| Goodness-of-fit on F <sup>2</sup> | 1.080                              |
| Final R indices [I>2sigma(I)]     | R1 = 0.0232, wR2 = 0.0612          |
| R indices (all data)              | R1 = 0.0232, wR2 = 0.0613          |
| Absolute structure parameter      | 0.04(3)                            |
| Extinction coefficient            | n/a                                |
| Largest diff. peak and hole       | 0.181 and -0.180 e.Å <sup>-3</sup> |

**Table S2.** Crystal data and structure refinement for Tor87, 6-oxocytidine (**7**), CCDC 1437716.

|                                 |                                                                                                    |
|---------------------------------|----------------------------------------------------------------------------------------------------|
| Report date                     | 2014-07-02                                                                                         |
| Identification code             | NF141b                                                                                             |
| Empirical formula               | C <sub>9</sub> H <sub>15</sub> N <sub>3</sub> O <sub>7</sub>                                       |
| Molecular formula               | C <sub>9</sub> H <sub>13</sub> N <sub>3</sub> O <sub>6</sub> , H <sub>2</sub> O                    |
| Formula weight                  | 277.24                                                                                             |
| Temperature                     | 100.0 K                                                                                            |
| Wavelength                      | 1.54178 Å                                                                                          |
| Crystal system                  | Orthorhombic                                                                                       |
| Space group                     | P 21 21 21                                                                                         |
| Unit cell dimensions            | a = 7.11510(10) Å      α = 90°.<br>b = 8.9631(2) Å      β = 90°.<br>c = 18.7210(4) Å      γ = 90°. |
| Volume                          | 1193.90(4) Å <sup>3</sup>                                                                          |
| Z                               | 4                                                                                                  |
| Density (calculated)            | 1.542 Mg/m <sup>3</sup>                                                                            |
| Absorption coefficient          | 1.161 mm <sup>-1</sup>                                                                             |
| F(000)                          | 584                                                                                                |
| Crystal size                    | 0.251 x 0.153 x 0.142 mm <sup>3</sup>                                                              |
| Crystal color, habit            | Colorless Block                                                                                    |
| Theta range for data collection | 4.724 to 68.193°.                                                                                  |
| Index ranges                    | -8<=h<=7, -10<=k<=9, -21<=l<=22                                                                    |
| Reflections collected           | 7838                                                                                               |
| Independent reflections         | 2168 [R(int) = 0.0216]                                                                             |
| Completeness to theta = 68.000° | 99.7 %                                                                                             |
| Absorption correction           | Semi-empirical from equivalents                                                                    |
| Max. and min. transmission      | 0.7530 and 0.6907                                                                                  |
| Refinement method               | Full-matrix least-squares on F <sup>2</sup>                                                        |

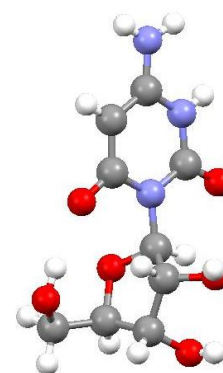



|                                   |                                    |
|-----------------------------------|------------------------------------|
| Data / restraints / parameters    | 2168 / 8 / 204                     |
| Goodness-of-fit on F <sup>2</sup> | 1.097                              |
| Final R indices [I>2σ(I)]         | R1 = 0.0237, wR2 = 0.0618          |
| R indices (all data)              | R1 = 0.0241, wR2 = 0.0620          |
| Absolute structure parameter      | 0.00(6)                            |
| Extinction coefficient            | n/a                                |
| Largest diff. peak and hole       | 0.176 and -0.165 e.Å <sup>-3</sup> |

**Table S3.** Crystal data and structure refinement for Tor82, 6-amino-5-(4-nitrophenylazo) uridine (**5**), CCDC 1437715.

|                                 |                                       |                 |
|---------------------------------|---------------------------------------|-----------------|
| Report date                     | 2014-05-28                            |                 |
| Identification code             | NF221                                 |                 |
| Empirical formula               | C15 H20 N6 O10                        |                 |
| Molecular formula               | C15 H16 N6 O8, 2(H2 O)                |                 |
| Formula weight                  | 444.37                                |                 |
| Temperature                     | 100.0 K                               |                 |
| Wavelength                      | 1.54178 Å                             |                 |
| Crystal system                  | Monoclinic                            |                 |
| Space group                     | P 1 21 1                              |                 |
| Unit cell dimensions            | a = 4.9790(2) Å                       | α = 90°.        |
|                                 | b = 10.7305(4) Å                      | β = 96.594(2)°. |
|                                 | c = 16.8422(7) Å                      | γ = 90°.        |
| Volume                          | 893.88(6) Å <sup>3</sup>              |                 |
| Z                               | 2                                     |                 |
| Density (calculated)            | 1.651 Mg/m <sup>3</sup>               |                 |
| Absorption coefficient          | 1.217 mm <sup>-1</sup>                |                 |
| F(000)                          | 464                                   |                 |
| Crystal size                    | 0.157 x 0.035 x 0.021 mm <sup>3</sup> |                 |
| Crystal color, habit            | Yellow Needle                         |                 |
| Theta range for data collection | 2.641 to 68.853°.                     |                 |
| Index ranges                    | -5<=h<=5, -12<=k<=12, -20<=l<=20      |                 |
| Reflections collected           | 21896                                 |                 |
| Independent reflections         | 3239 [R(int) = 0.0331]                |                 |
| Completeness to theta = 68.000° | 99.8 %                                |                 |
| Absorption correction           | Semi-empirical from equivalents       |                 |

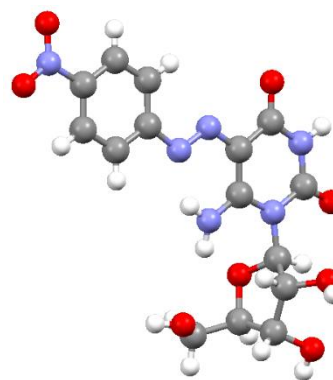

|                                   |                                             |
|-----------------------------------|---------------------------------------------|
| Max. and min. transmission        | 0.7531 and 0.6752                           |
| Refinement method                 | Full-matrix least-squares on F <sup>2</sup> |
| Data / restraints / parameters    | 3239 / 11 / 320                             |
| Goodness-of-fit on F <sup>2</sup> | 1.047                                       |
| Final R indices [I>2sigma(I)]     | R1 = 0.0242, wR2 = 0.0605                   |
| R indices (all data)              | R1 = 0.0259, wR2 = 0.0614                   |
| Absolute structure parameter      | 0.06(7)                                     |
| Extinction coefficient            | n/a                                         |
| Largest diff. peak and hole       | 0.209 and -0.168 e.Å <sup>-3</sup>          |

**Table S4.** Crystal data and structure refinement for Tor90, 5-(4-nitrophenylazo)-6-oxocytidine (**8**), CCDC 1437718.

|                                 |                                                         |                                                                                     |
|---------------------------------|---------------------------------------------------------|-------------------------------------------------------------------------------------|
| Report date                     | 2014-07-31                                              | 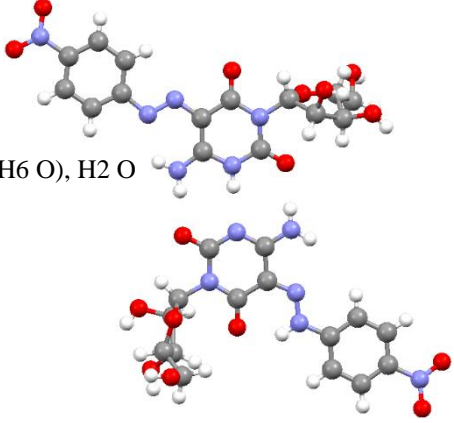 |
| Identification code             | NF244                                                   |                                                                                     |
| Empirical formula               | C31 H37 N12 O17.50                                      |                                                                                     |
| Molecular formula               | 2(C15 H16 N6 O8), 0.5(C2 H6 O), H2 O                    |                                                                                     |
| Formula weight                  | 857.72                                                  |                                                                                     |
| Temperature                     | 100.0 K                                                 |                                                                                     |
| Wavelength                      | 1.54178 Å                                               |                                                                                     |
| Crystal system                  | Triclinic                                               |                                                                                     |
| Space group                     | P 1                                                     |                                                                                     |
| Unit cell dimensions            | a = 7.7143(2) Å<br>b = 10.5890(3) Å<br>c = 11.4023(3) Å |                                                                                     |
| Volume                          | 904.32(4) Å <sup>3</sup>                                |                                                                                     |
| Z                               | 1                                                       |                                                                                     |
| Density (calculated)            | 1.575 Mg/m <sup>3</sup>                                 |                                                                                     |
| Absorption coefficient          | 1.129 mm <sup>-1</sup>                                  |                                                                                     |
| F(000)                          | 447                                                     |                                                                                     |
| Crystal size                    | 0.113 x 0.032 x 0.021 mm <sup>3</sup>                   |                                                                                     |
| Crystal color, habit            | Orange Needle                                           |                                                                                     |
| Theta range for data collection | 3.920 to 68.399°.                                       |                                                                                     |
| Index ranges                    | -9<=h<=9, -11<=k<=12, -13<=l<=13                        |                                                                                     |
| Reflections collected           | 21045                                                   |                                                                                     |
| Independent reflections         | 6016 [R(int) = 0.0439]                                  |                                                                                     |
| Completeness to theta = 68.000° | 97.8 %                                                  |                                                                                     |

|                                   |                                             |
|-----------------------------------|---------------------------------------------|
| Absorption correction             | Semi-empirical from equivalents             |
| Max. and min. transmission        | 0.7531 and 0.6937                           |
| Refinement method                 | Full-matrix least-squares on F <sup>2</sup> |
| Data / restraints / parameters    | 6016 / 91 / 590                             |
| Goodness-of-fit on F <sup>2</sup> | 1.035                                       |
| Final R indices [I>2σ(I)]         | R1 = 0.0506, wR2 = 0.1301                   |
| R indices (all data)              | R1 = 0.0648, wR2 = 0.1402                   |
| Absolute structure parameter      | 0.08(13)                                    |
| Extinction coefficient            | n/a                                         |
| Largest diff. peak and hole       | 0.462 and -0.260 e.Å <sup>-3</sup>          |

**Table S5.** Crystal data and structure refinement for Tor89Cu, 5-(4-nitrophenylhydrazono)-6-oxouridine (**9**), CCDC 1437717.

|                                 |                                       |          |
|---------------------------------|---------------------------------------|----------|
| Report date                     | 2014-07-09                            |          |
| Identification code             | NF244-CM                              |          |
| Empirical formula               | C15 H15 N5 O9                         |          |
| Molecular formula               | C15 H15 N5 O9                         |          |
| Formula weight                  | 409.32                                |          |
| Temperature                     | 100.0 K                               |          |
| Wavelength                      | 1.54178 Å                             |          |
| Crystal system                  | Orthorhombic                          |          |
| Space group                     | P 21 21 21                            |          |
| Unit cell dimensions            | a = 6.7215(4) Å                       | α = 90°. |
|                                 | b = 10.5793(6) Å                      | β = 90°. |
|                                 | c = 22.9108(14) Å                     | γ = 90°. |
| Volume                          | 1629.16(17) Å <sup>3</sup>            |          |
| Z                               | 4                                     |          |
| Density (calculated)            | 1.669 Mg/m <sup>3</sup>               |          |
| Absorption coefficient          | 1.218 mm <sup>-1</sup>                |          |
| F(000)                          | 848                                   |          |
| Crystal size                    | 0.083 x 0.025 x 0.025 mm <sup>3</sup> |          |
| Crystal color, habit            | Yellow Needle                         |          |
| Theta range for data collection | 3.859 to 69.421°.                     |          |
| Index ranges                    | -8<=h<=8, -12<=k<=11, -27<=l<=27      |          |
| Reflections collected           | 19571                                 |          |

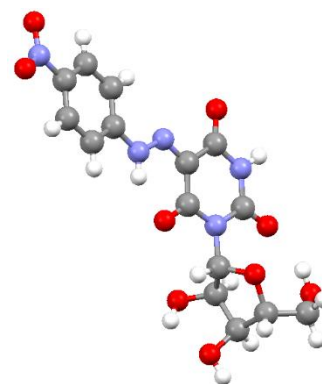

|                                   |                                             |
|-----------------------------------|---------------------------------------------|
| Independent reflections           | 2981 [R(int) = 0.0556]                      |
| Completeness to theta = 68.000°   | 99.8 %                                      |
| Absorption correction             | Semi-empirical from equivalents             |
| Max. and min. transmission        | 0.7001 and 0.6086                           |
| Refinement method                 | Full-matrix least-squares on F <sup>2</sup> |
| Data / restraints / parameters    | 2981 / 5 / 282                              |
| Goodness-of-fit on F <sup>2</sup> | 1.048                                       |
| Final R indices [I>2sigma(I)]     | R1 = 0.0419, wR2 = 0.1033                   |
| R indices (all data)              | R1 = 0.0475, wR2 = 0.1068                   |
| Absolute structure parameter      | -0.01(13)                                   |
| Extinction coefficient            | n/a                                         |
| Largest diff. peak and hole       | 0.443 and -0.260 e.Å <sup>-3</sup>          |

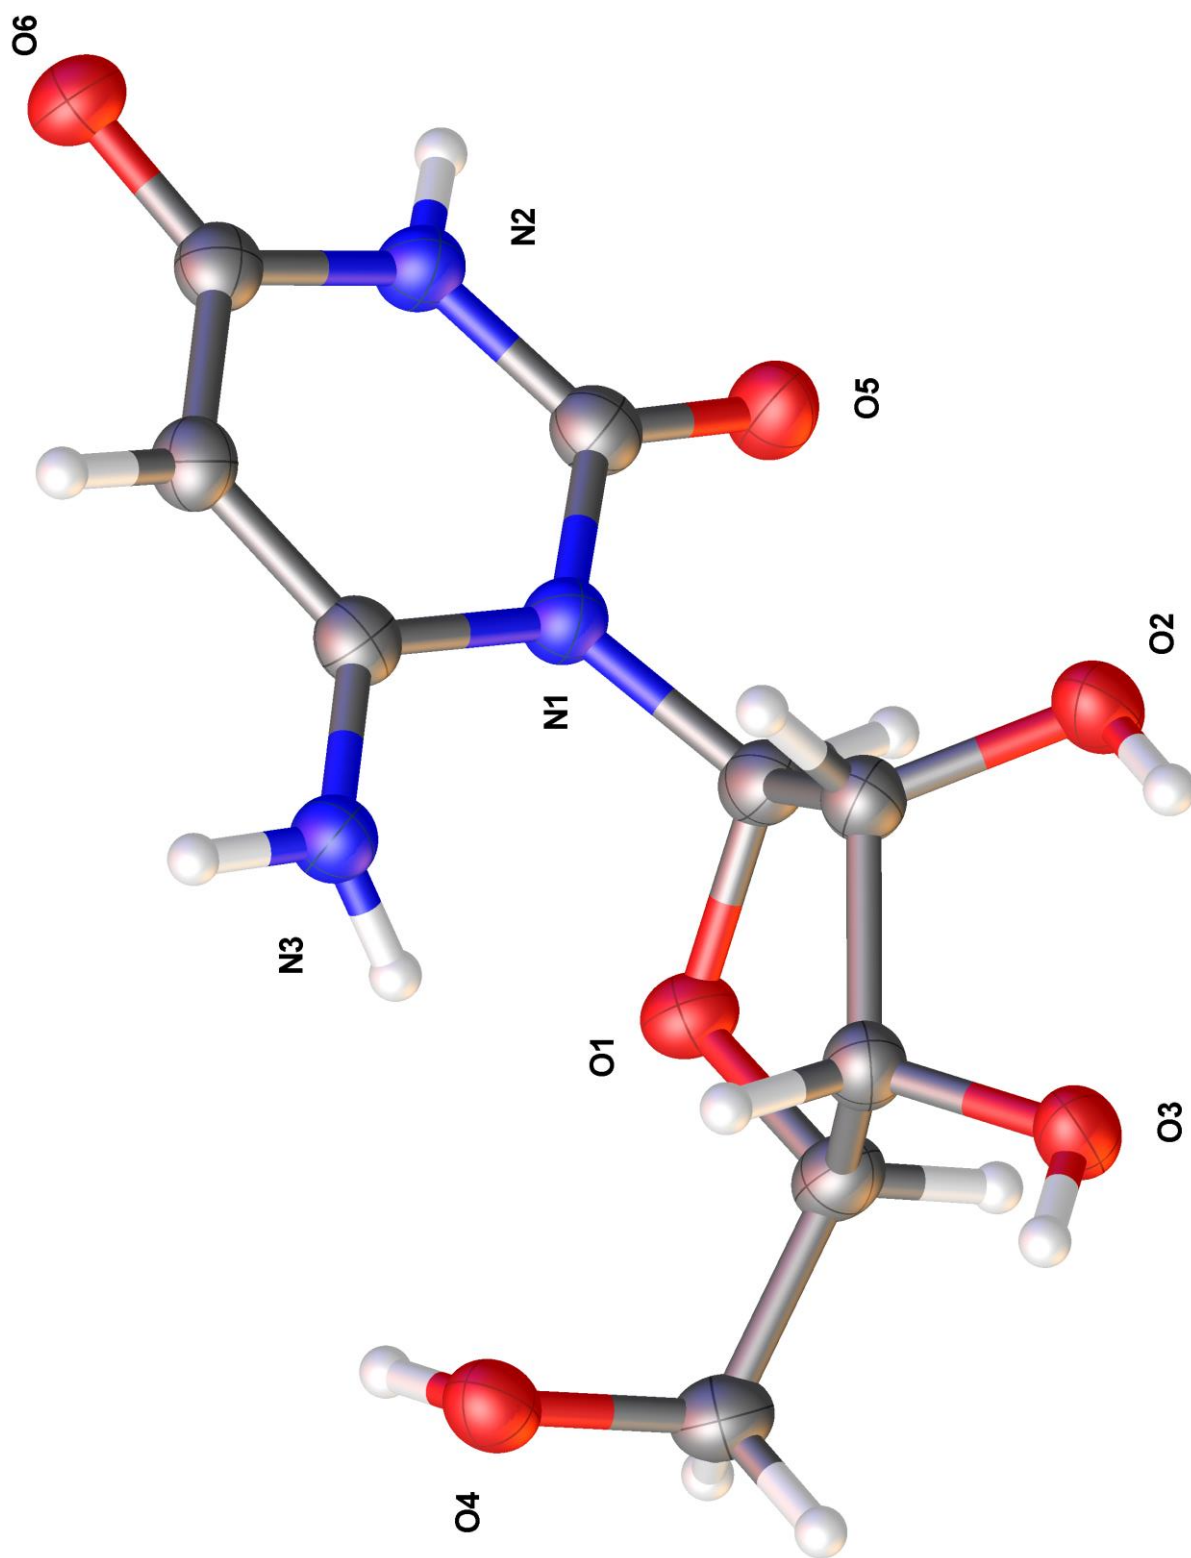

Figure S13. Crystal structure of 6-aminouridine (**4**) (Tor100, 50% contour percent probability).

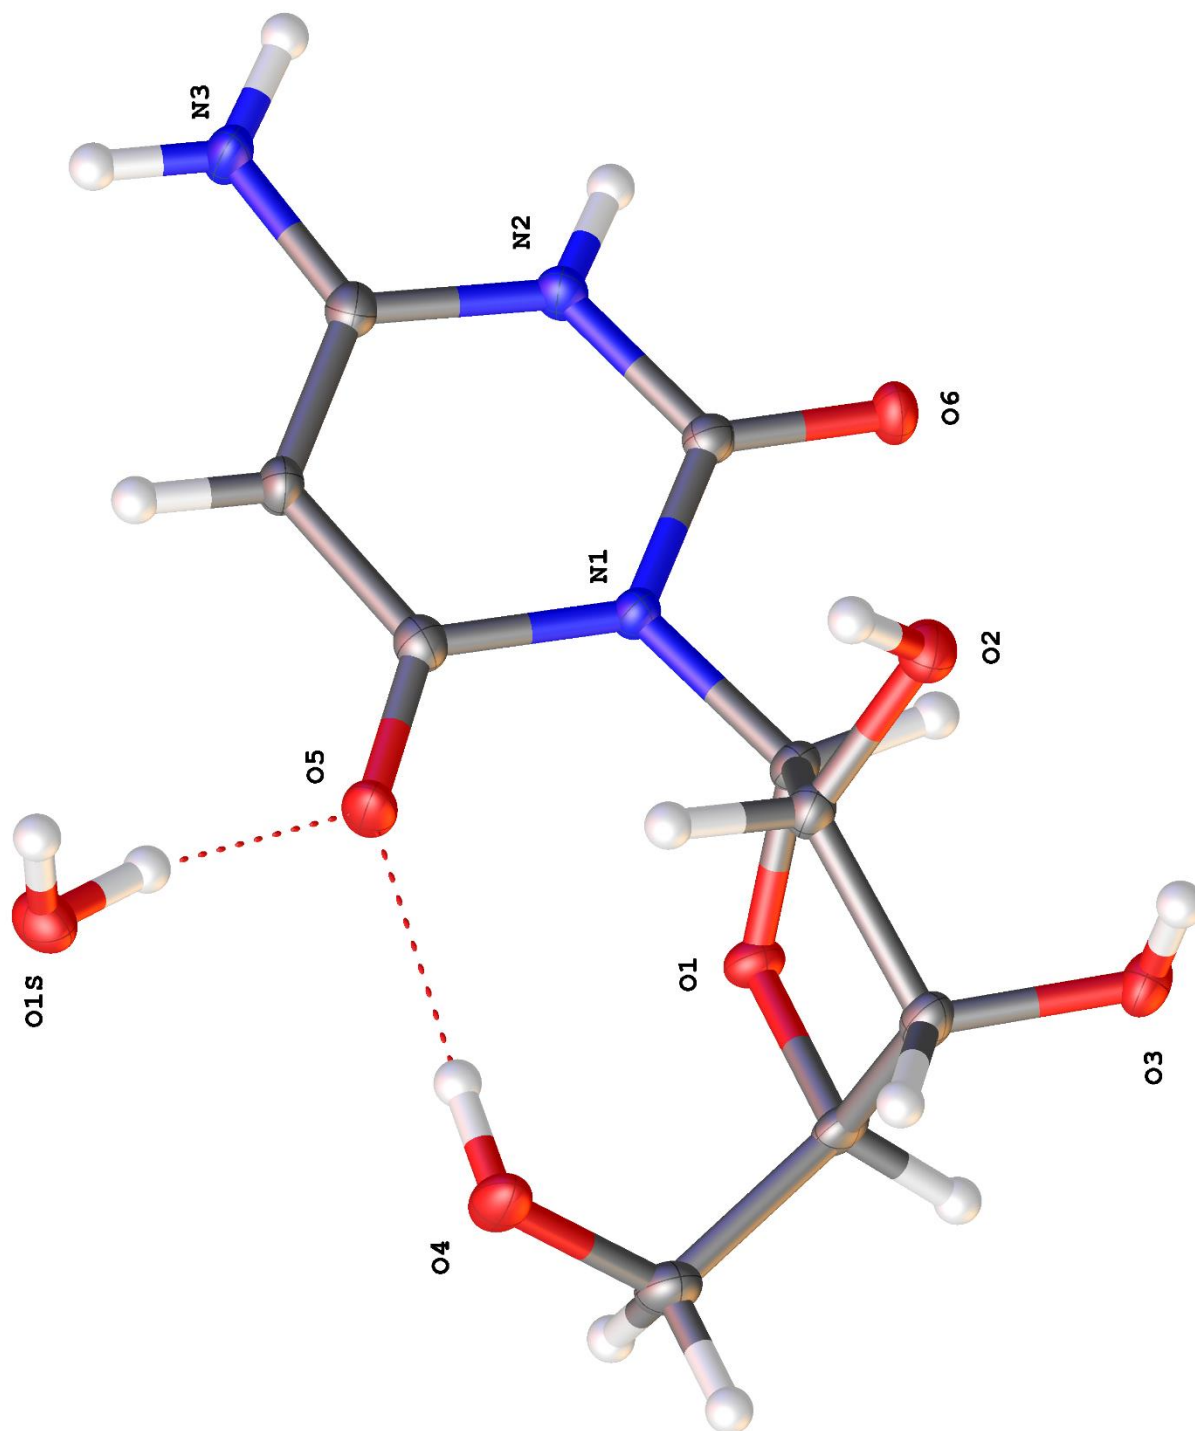

**Figure S14.** Crystal structure of 6-oxocytidine (**7**) (Tor87, 50% contour percent probability).

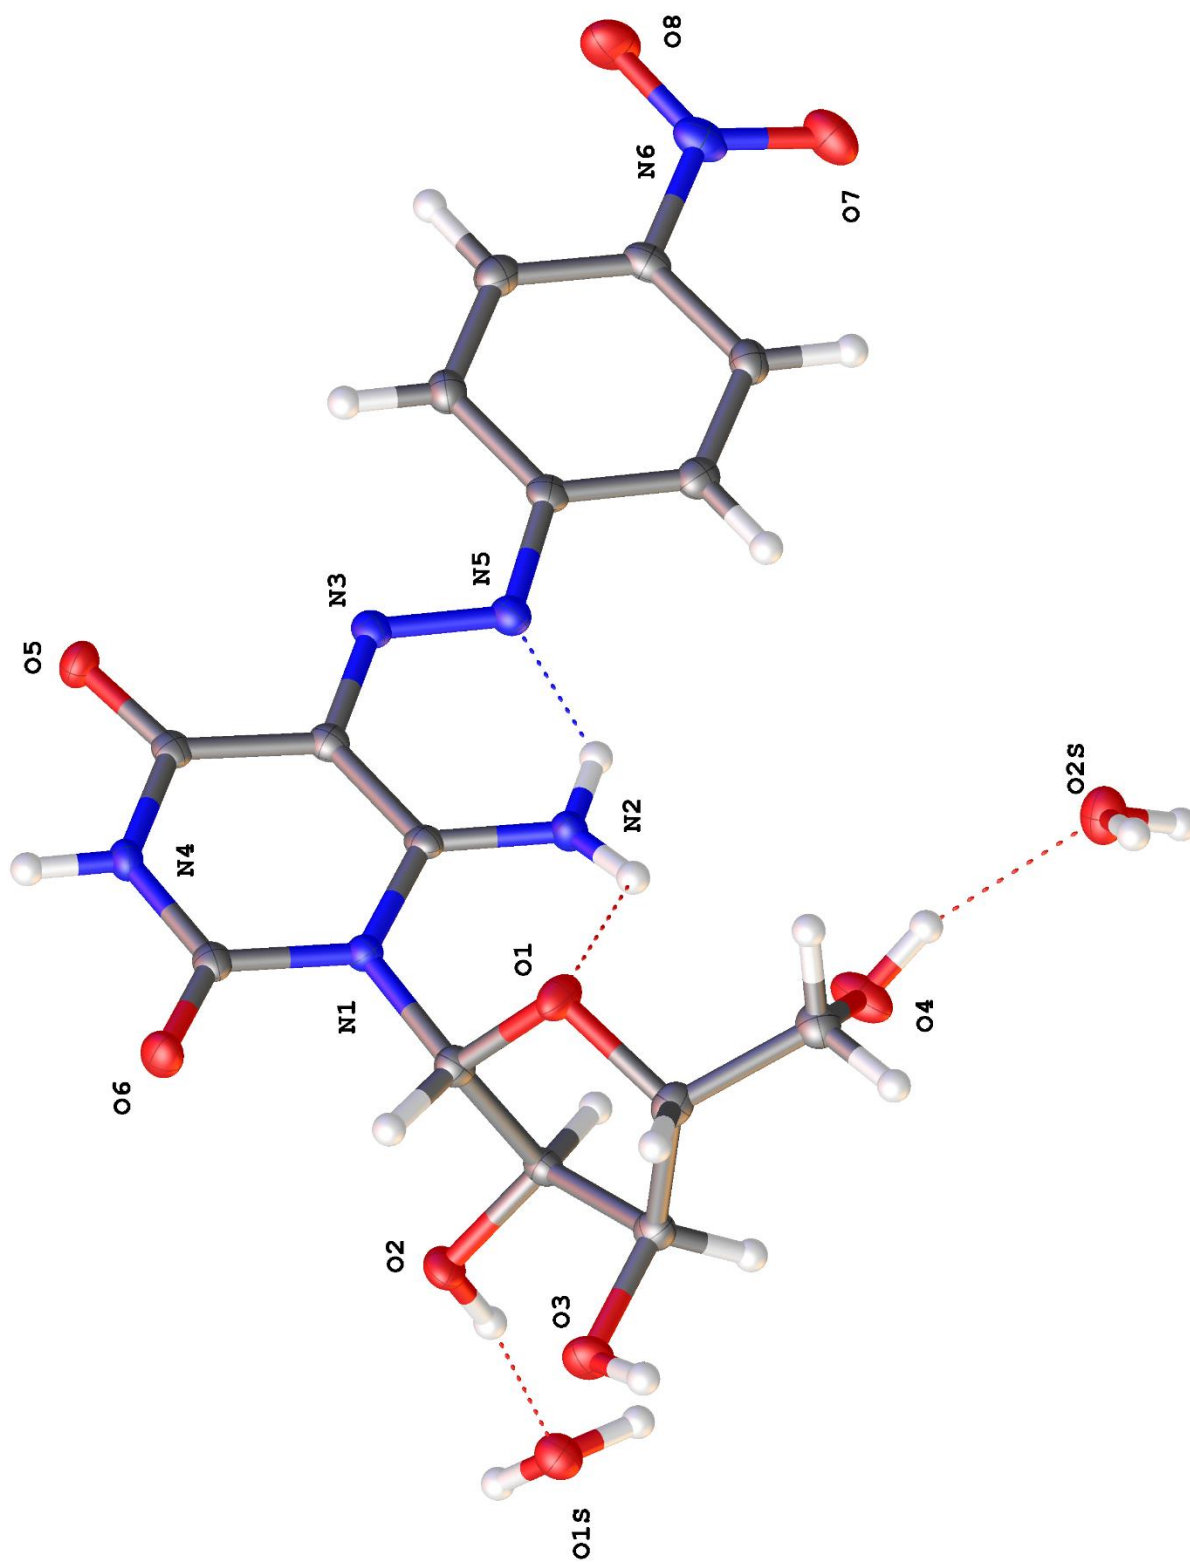

**Figure S15.** Crystal structure of 6-amino-5-(4-nitrophenylazo) uridine (**5**) (Tor82, 50% contour percent probability).

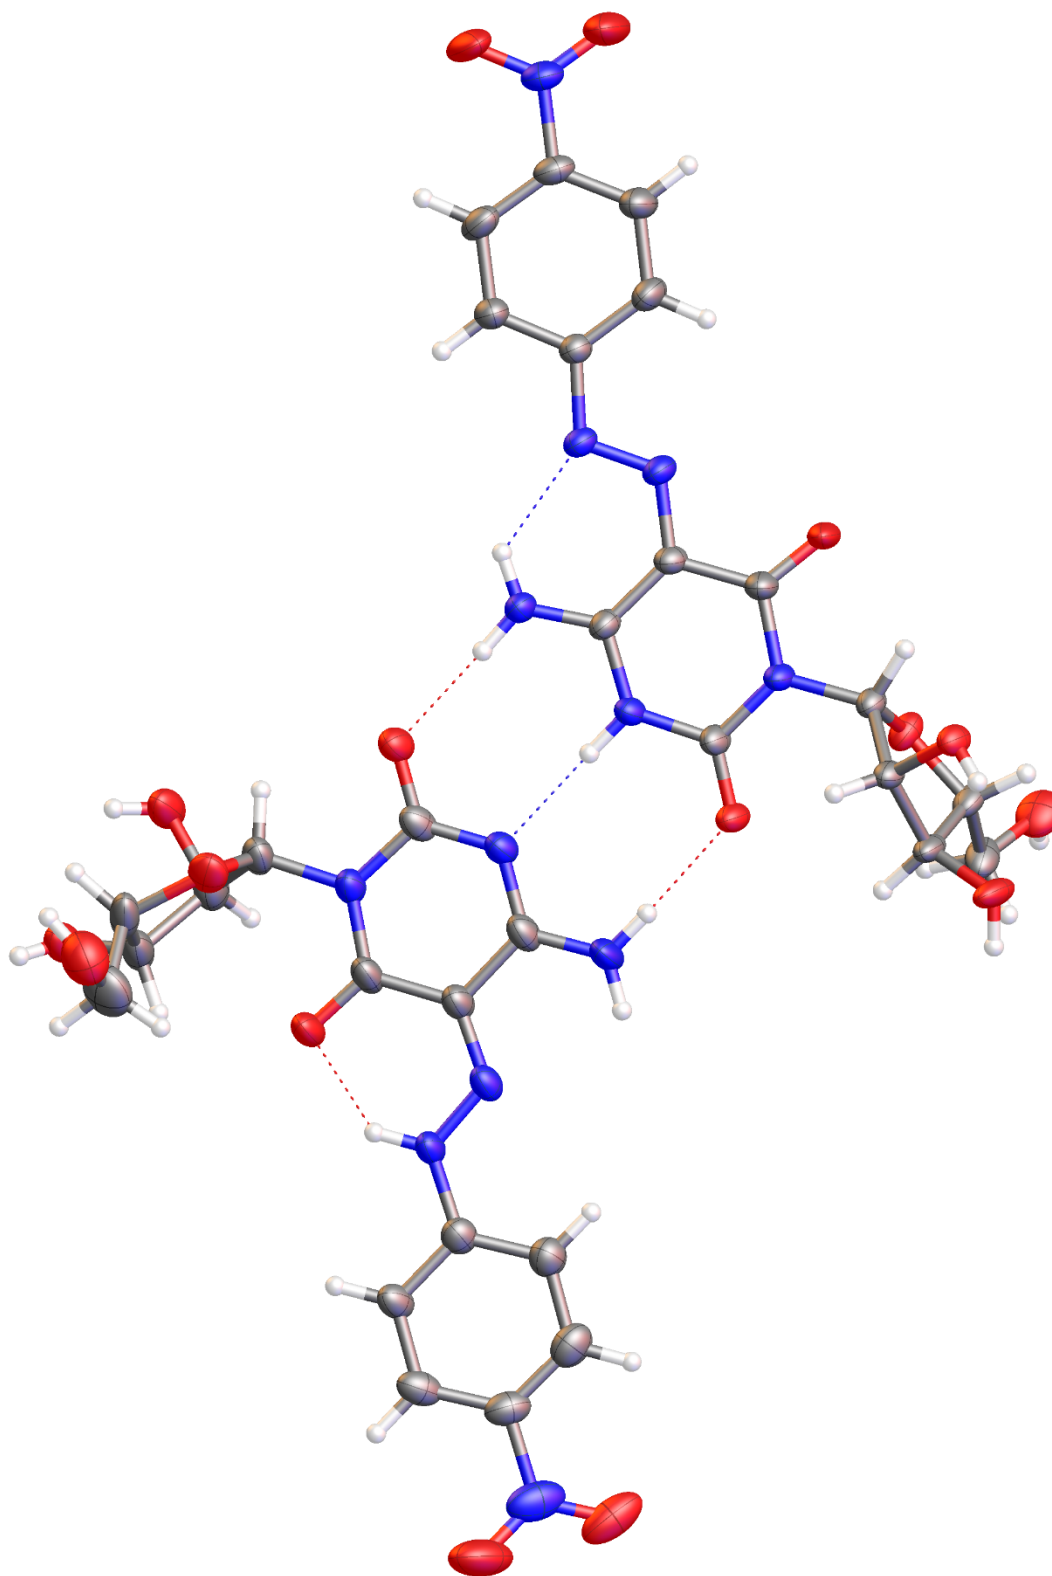

**Figure S16.** Crystal structure of 5-(4-nitrophenylazo)-6-oxocytidine (**8**) (Tor90, 50% contour percent probability).



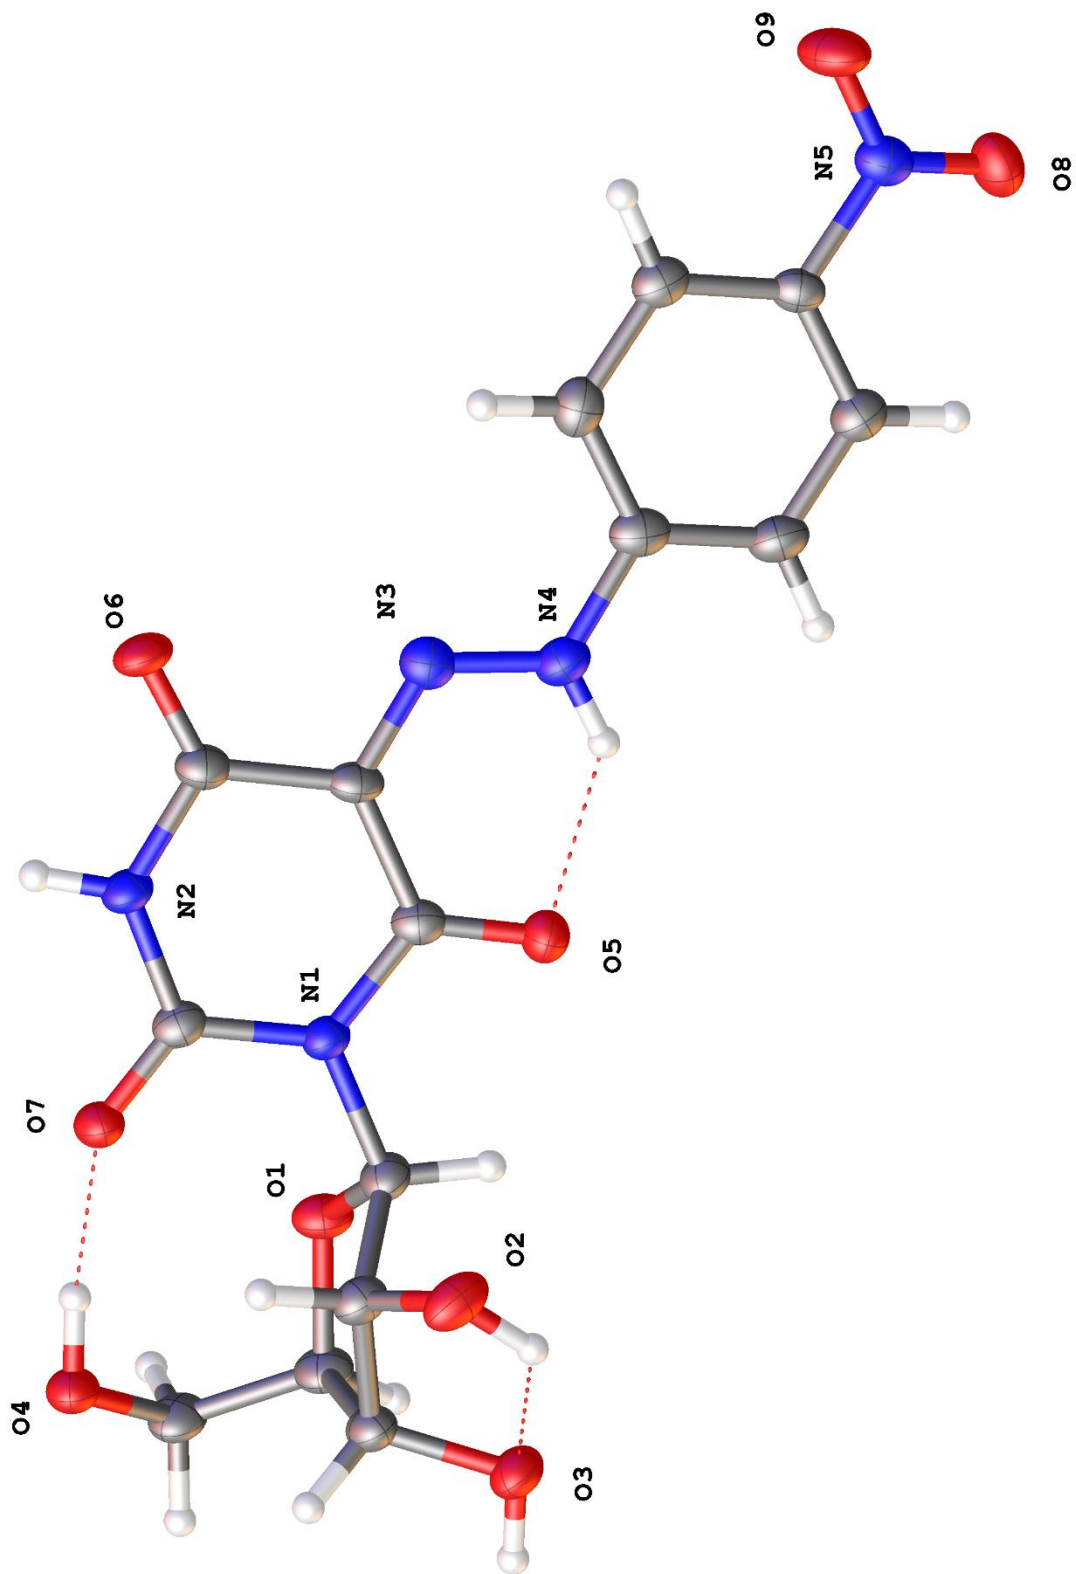

**Figure S17.** Crystal structure of 5-(4-nitrophenylhydrazono)-6-oxouridine (9) (Tor89Cu, 50% contour percent probability).

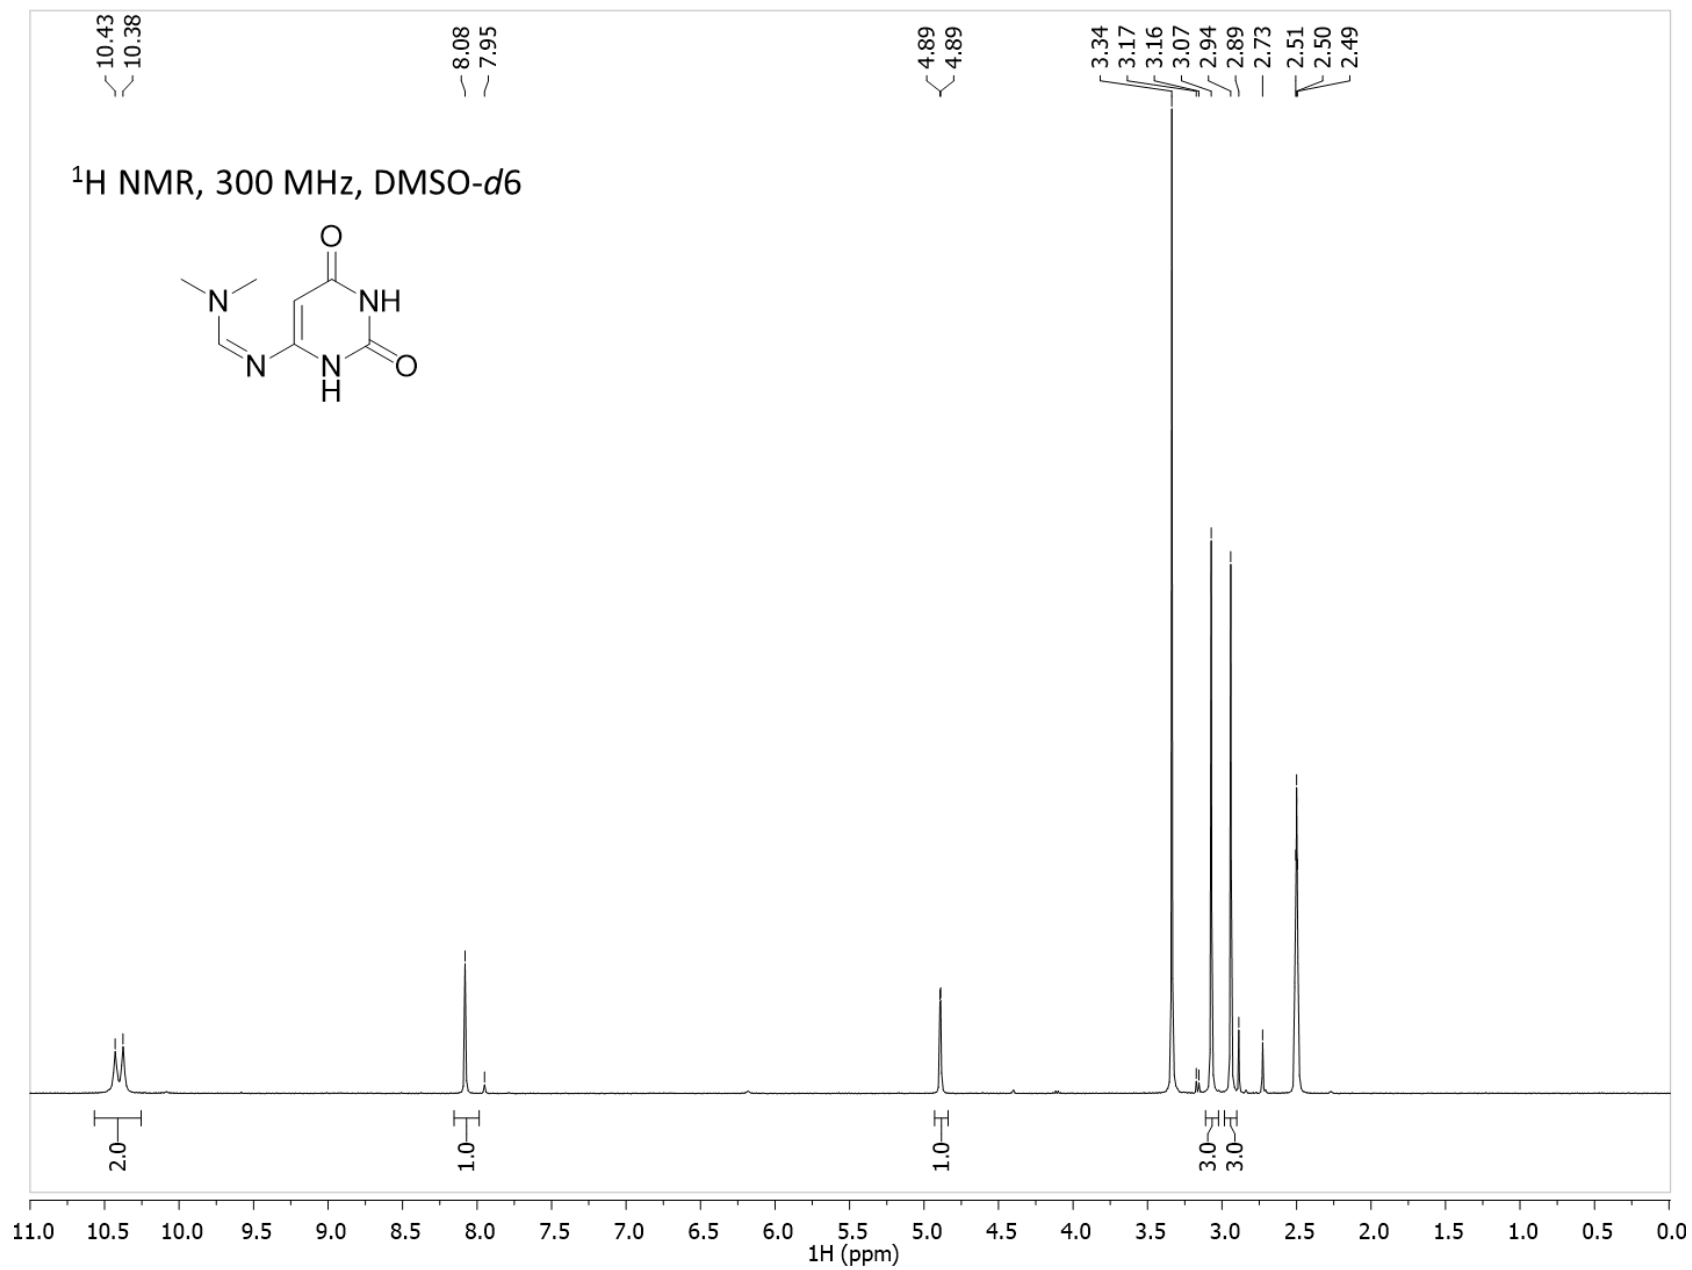

**Figure S18.** <sup>1</sup>H NMR of *N*<sup>6</sup>-DMF 6-amino uracil (**2**) (traces of DMF and MeOH)

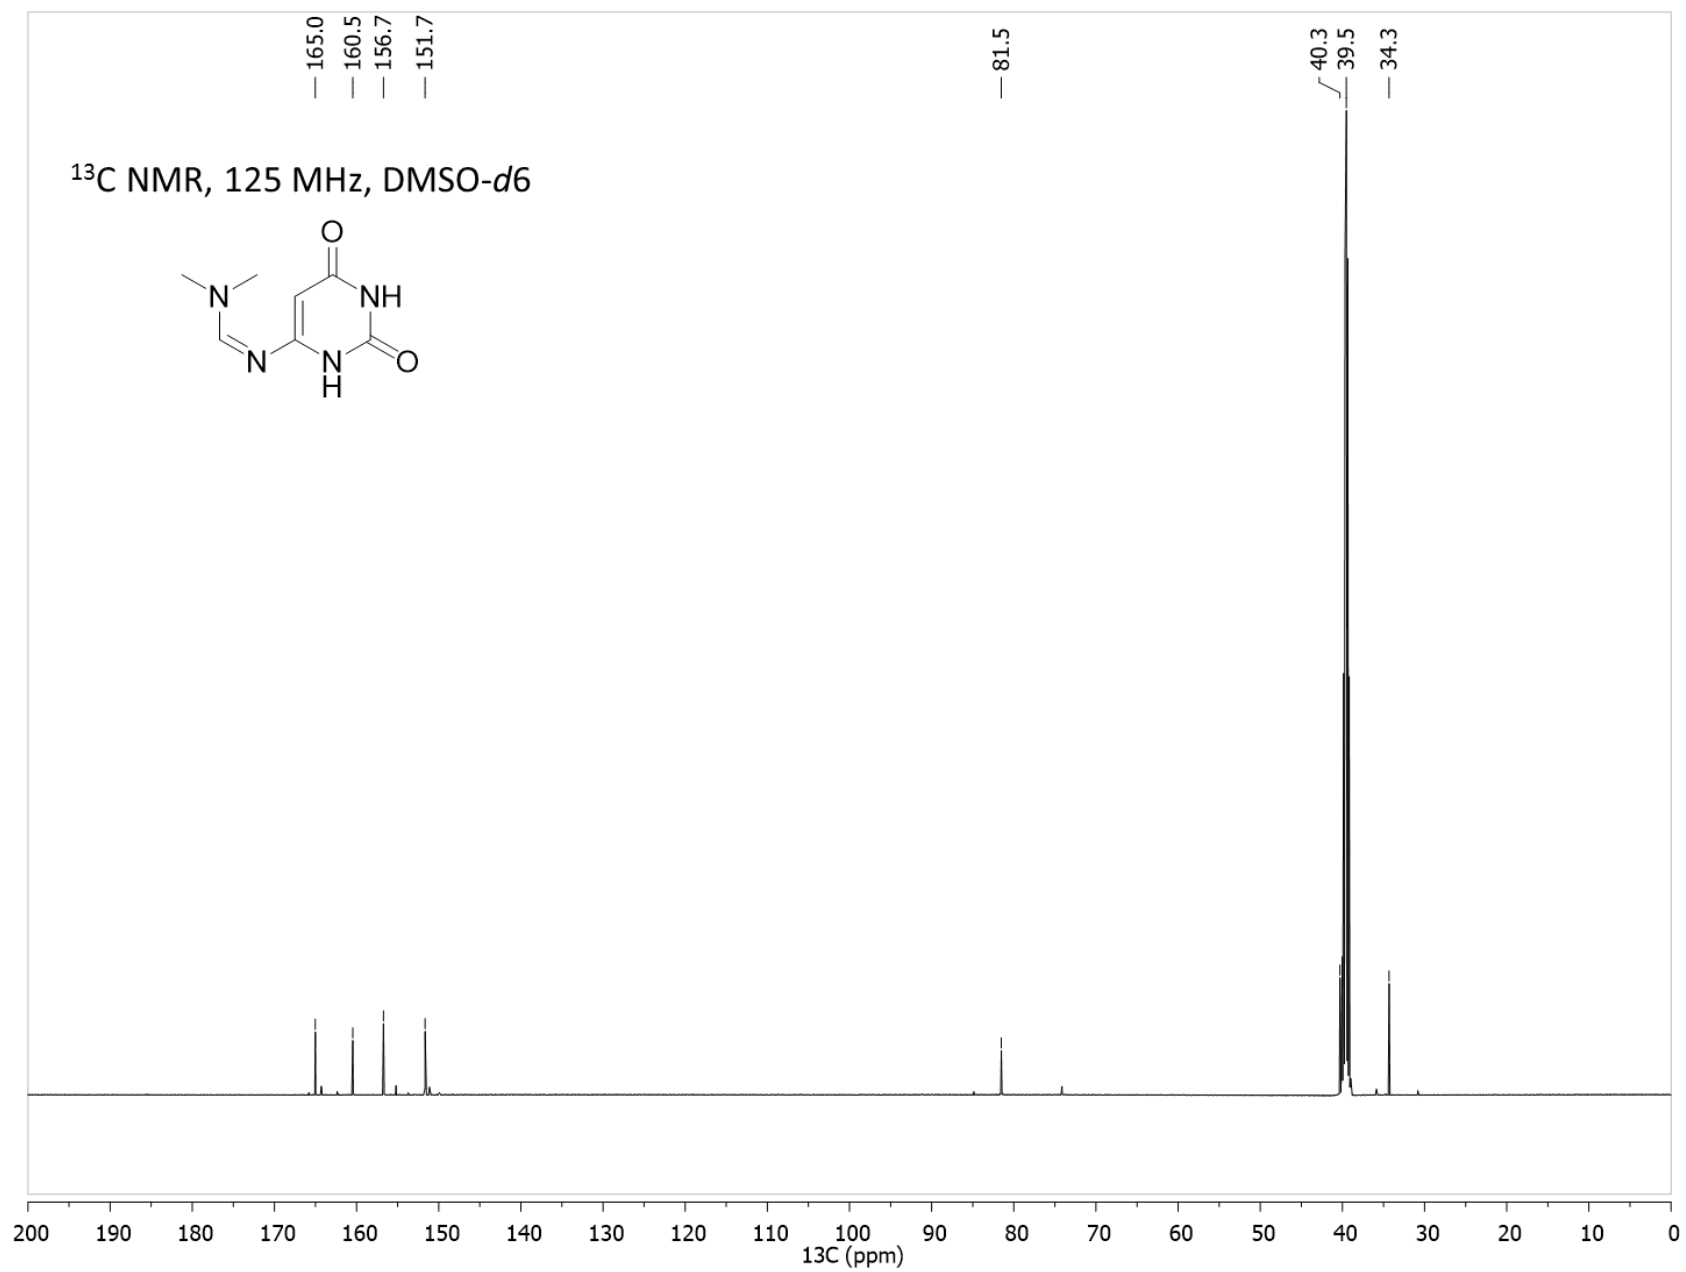

**Figure S19.** <sup>13</sup>C NMR of *N*<sup>6</sup>-DMF 6-amino uracil (**2**)

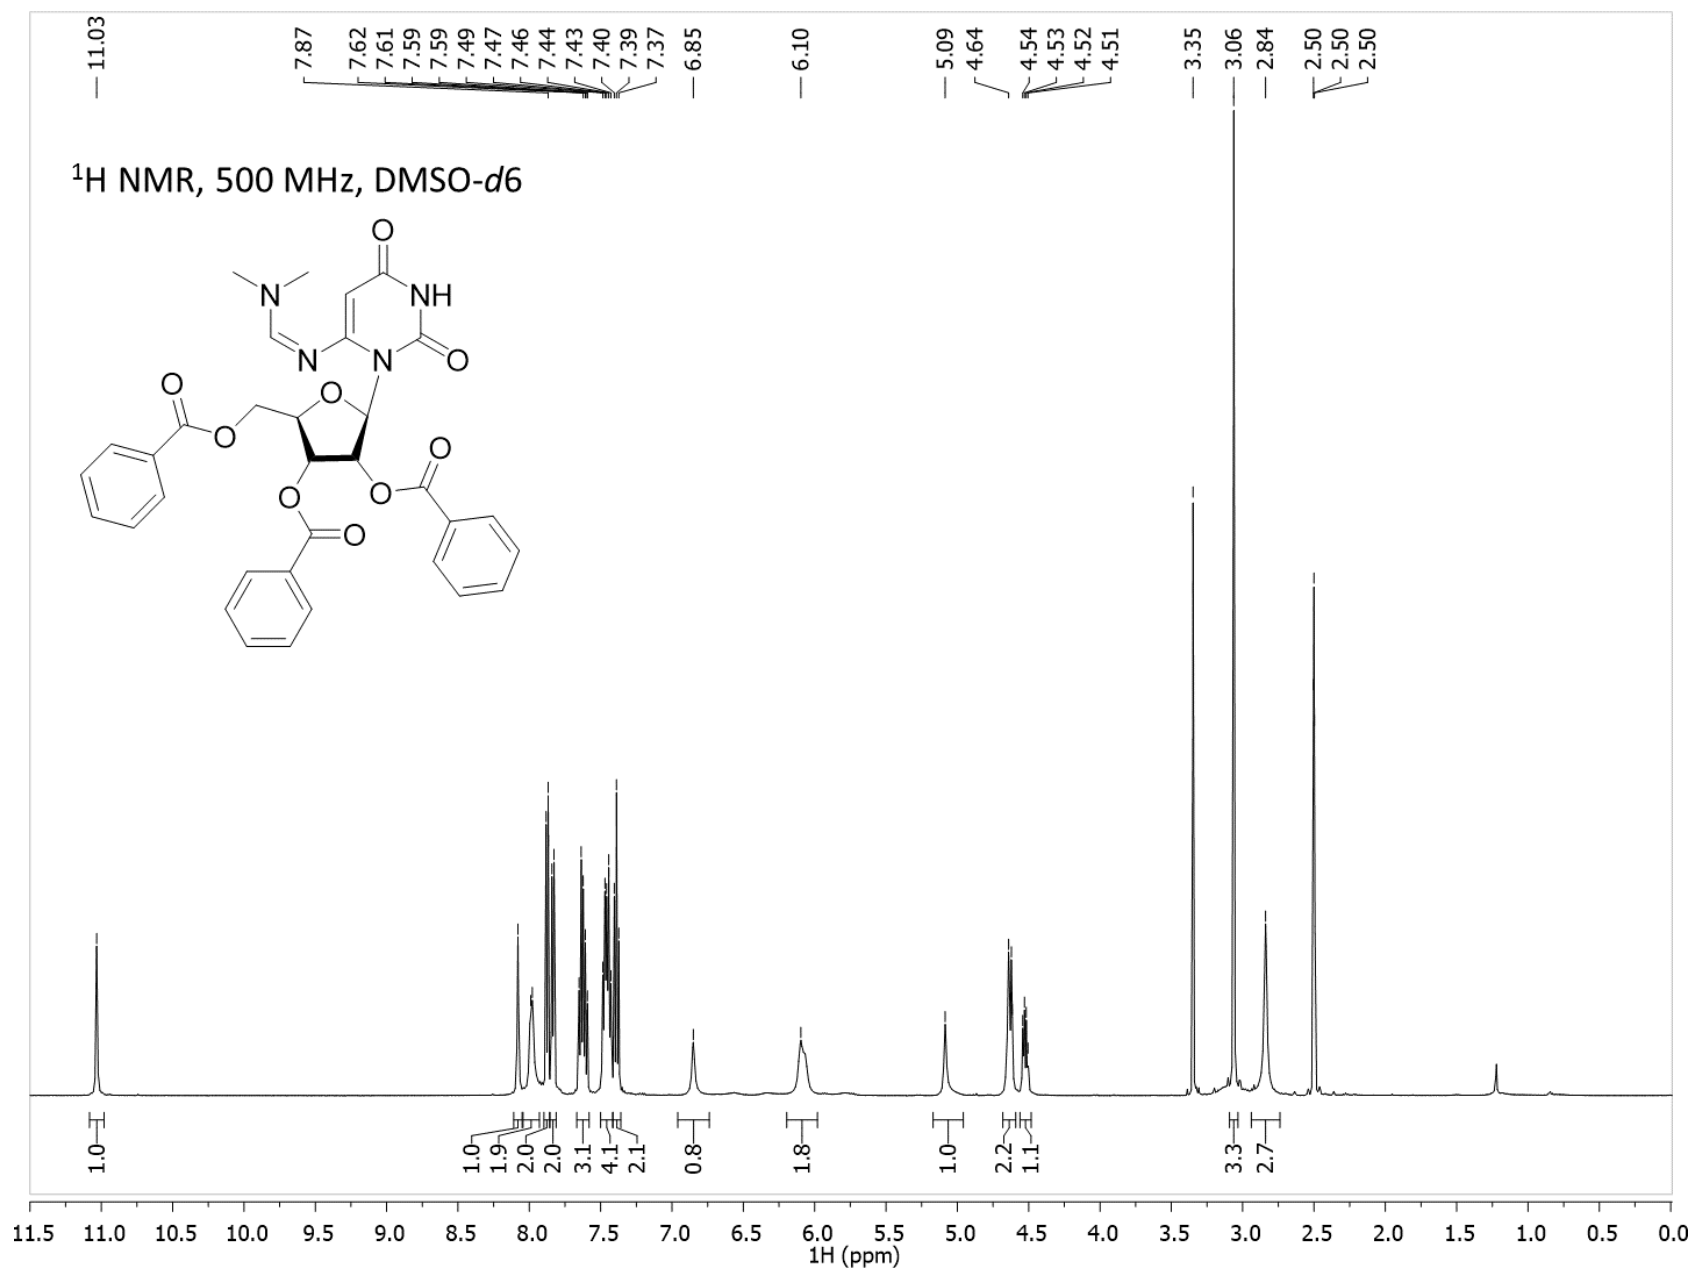

**Figure S20.** <sup>1</sup>H NMR of *N*<sup>6</sup>-DMF 2',3',5'-tri-*O*-benzoyl 6-amino uridine (**3**)

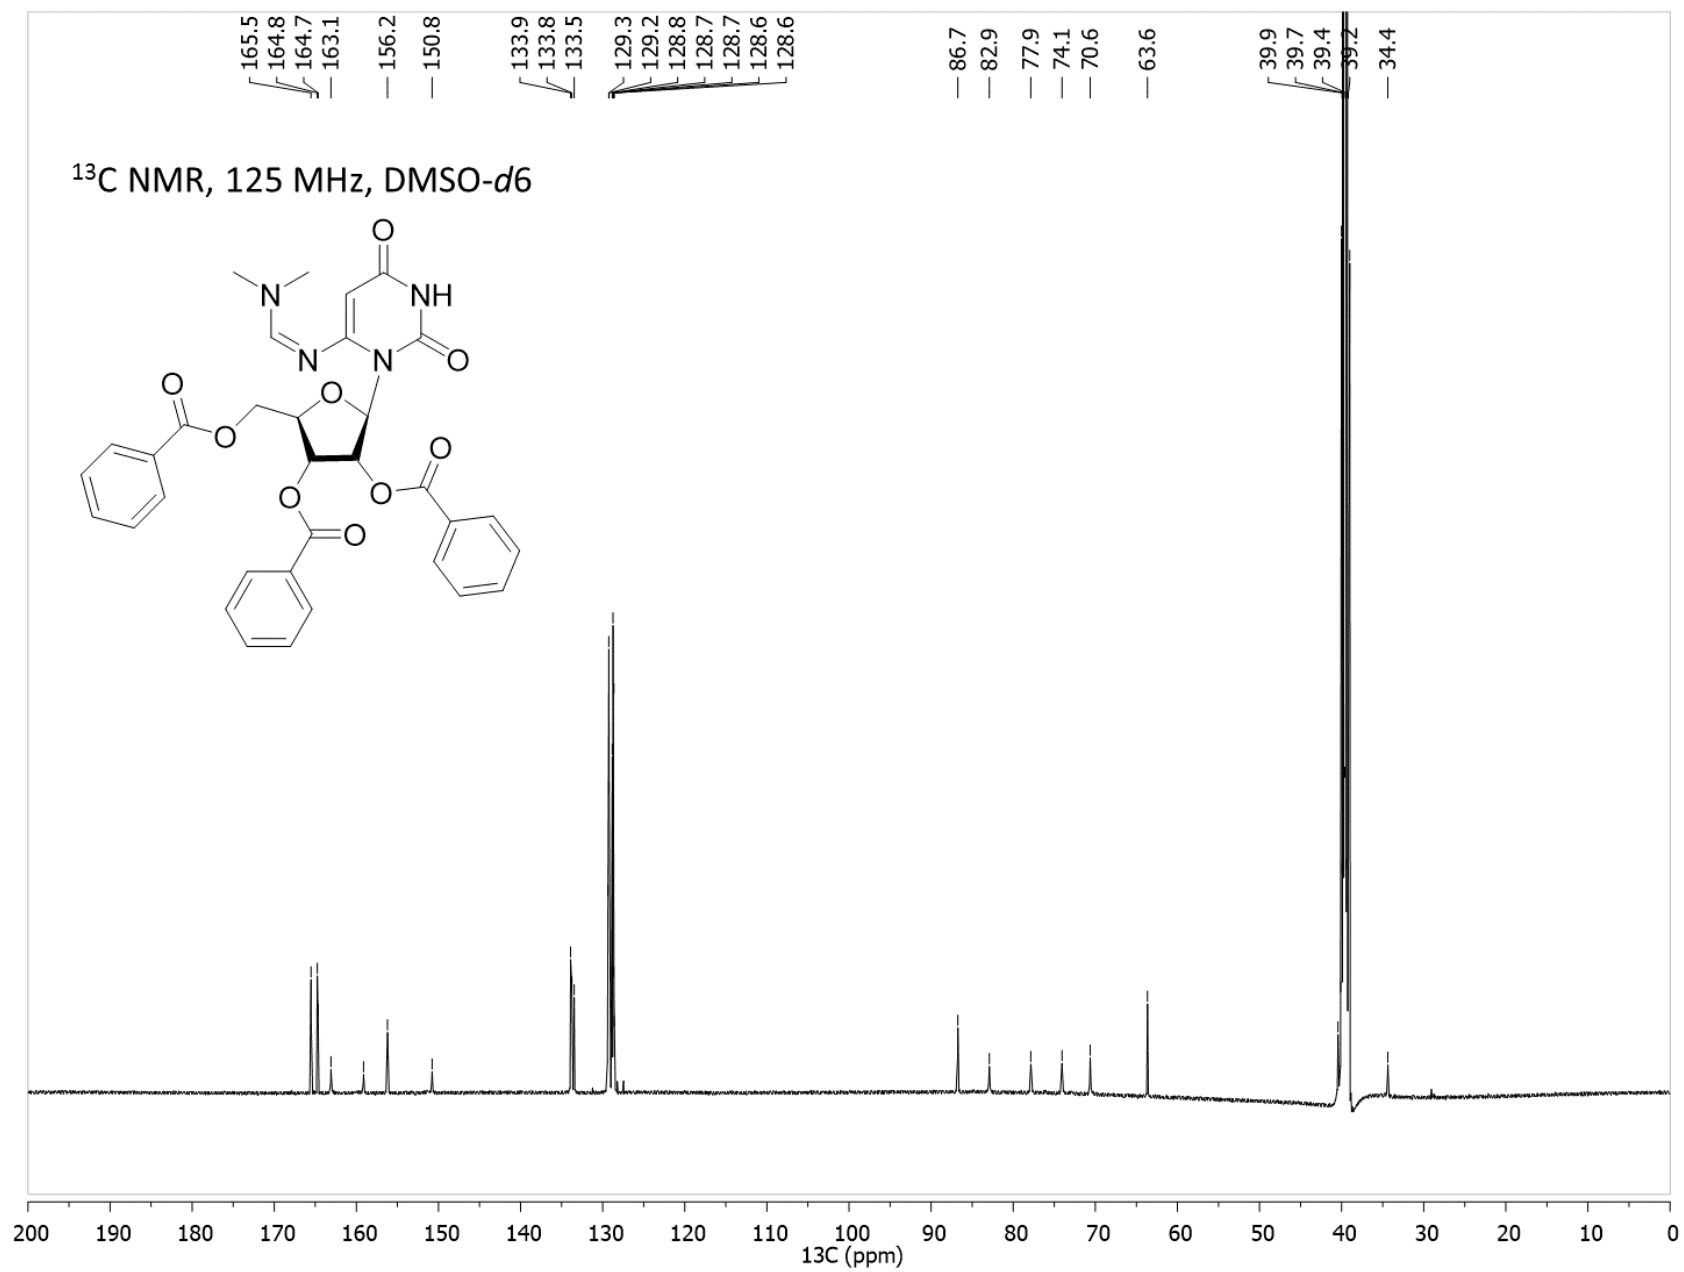

**Figure S21.** <sup>13</sup>C NMR of *N*<sup>6</sup>-DMF 2',3',5'-tri-*O*-benzoyl 6-amino uridine (**3**)

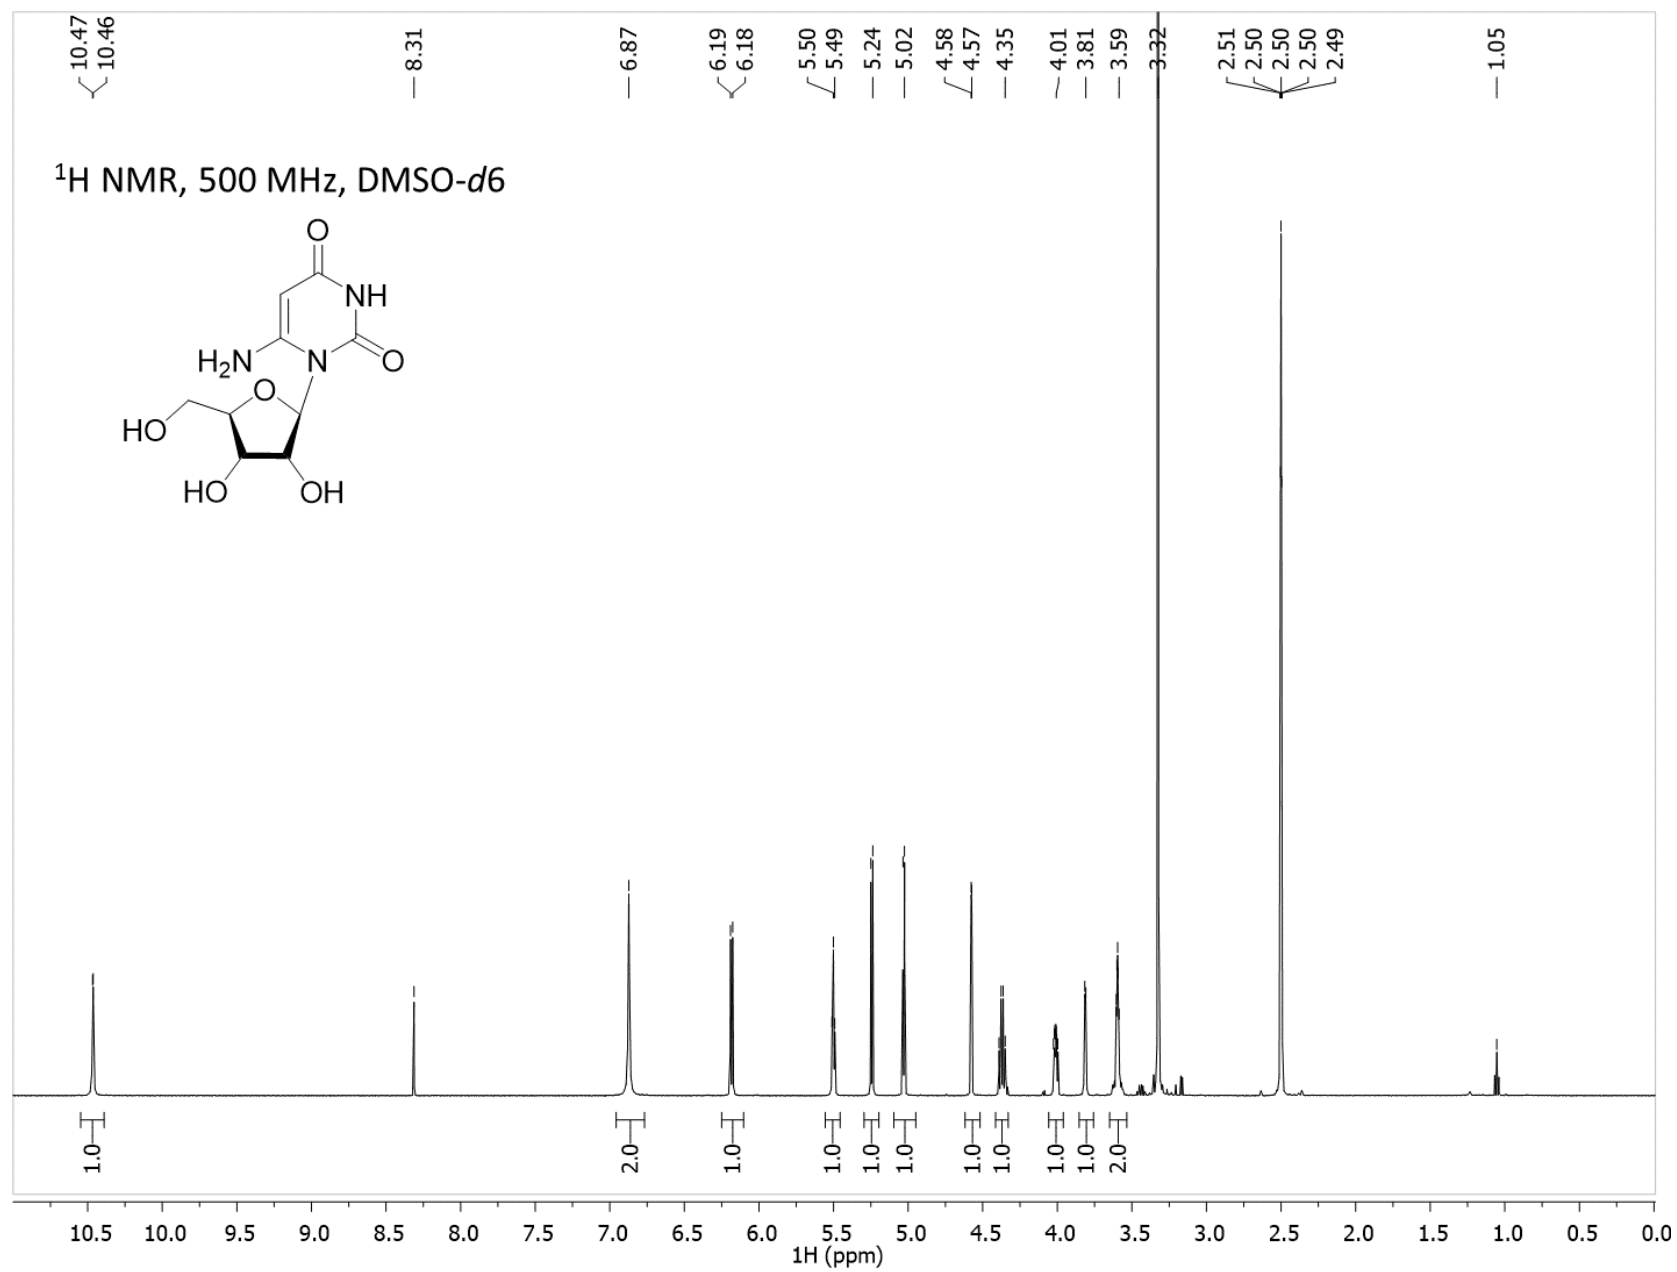

**Figure S22.** <sup>1</sup>H NMR of 6-amino uridine (**4**)

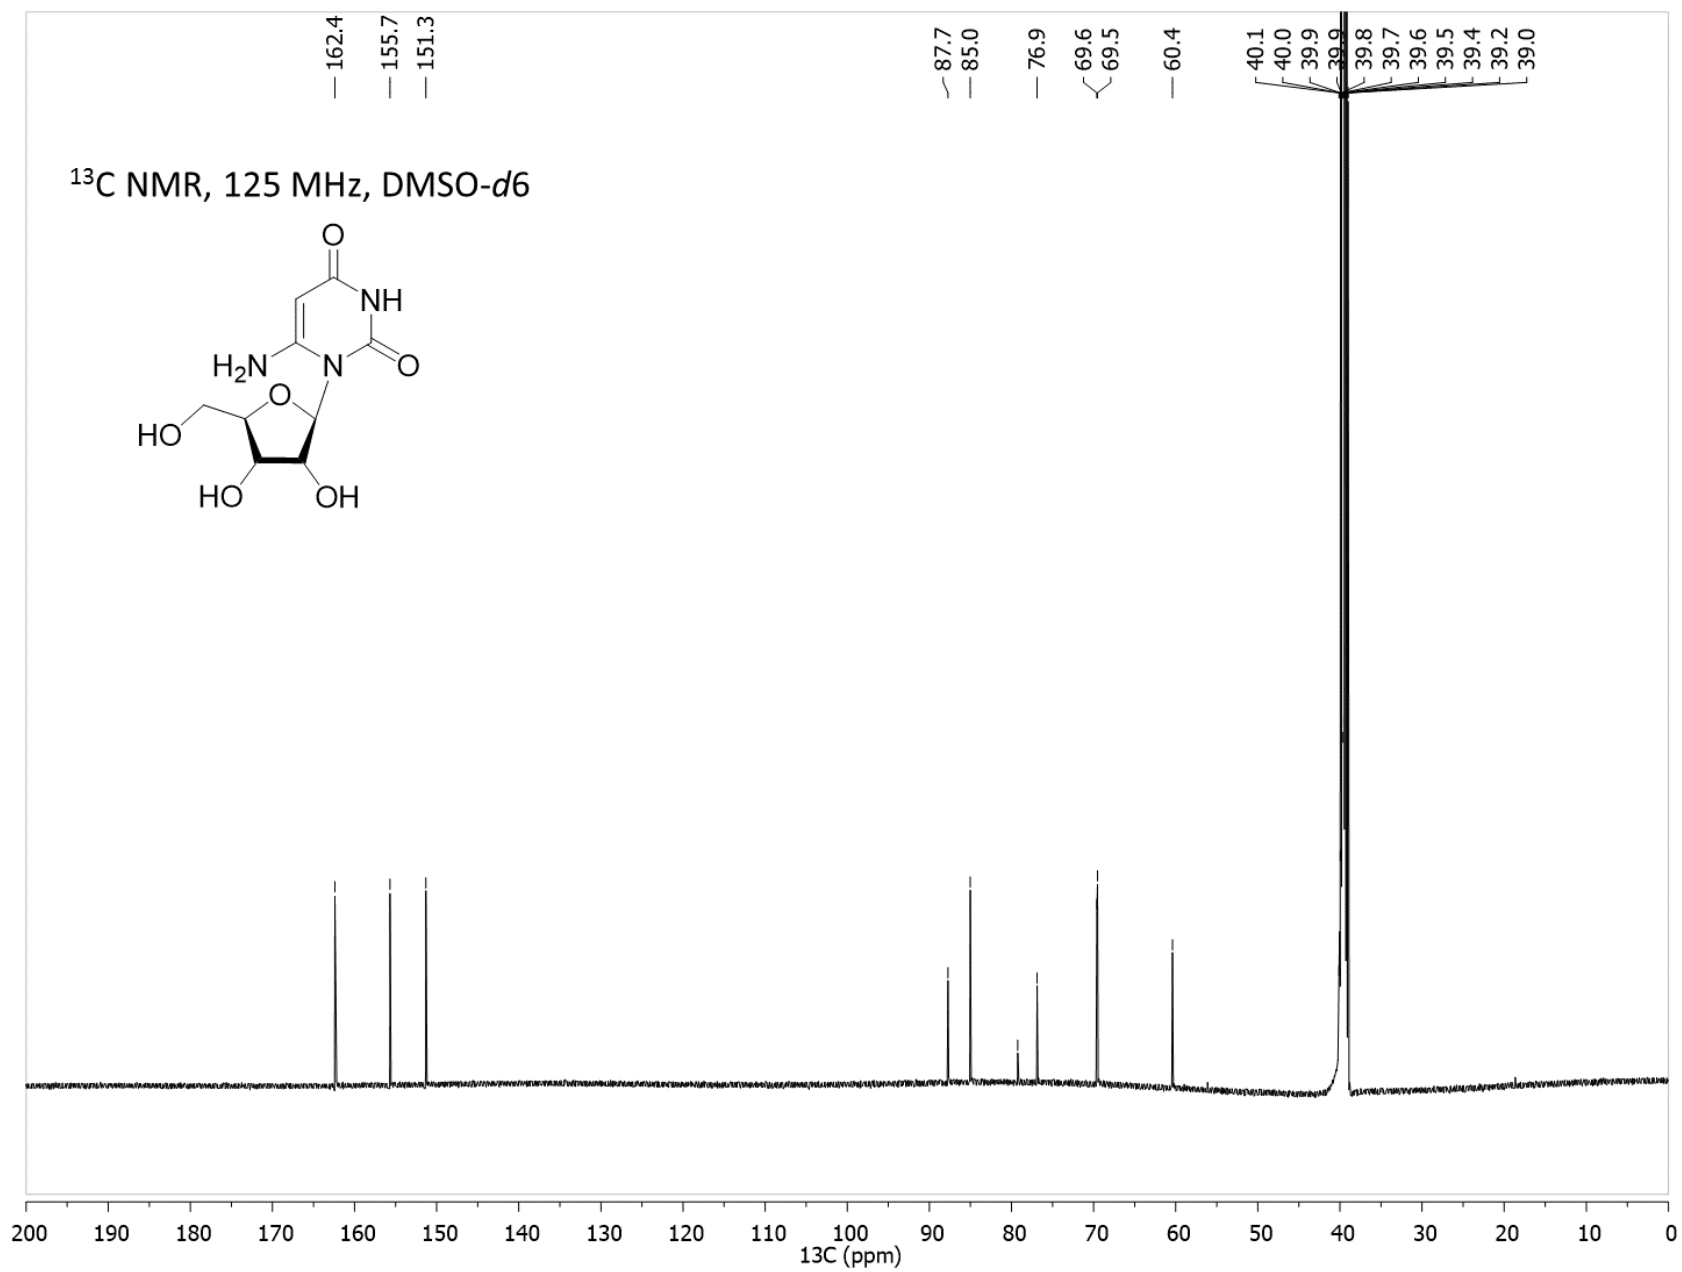

**Figure S23.** <sup>13</sup>C NMR of 6-amino uridine (**4**)

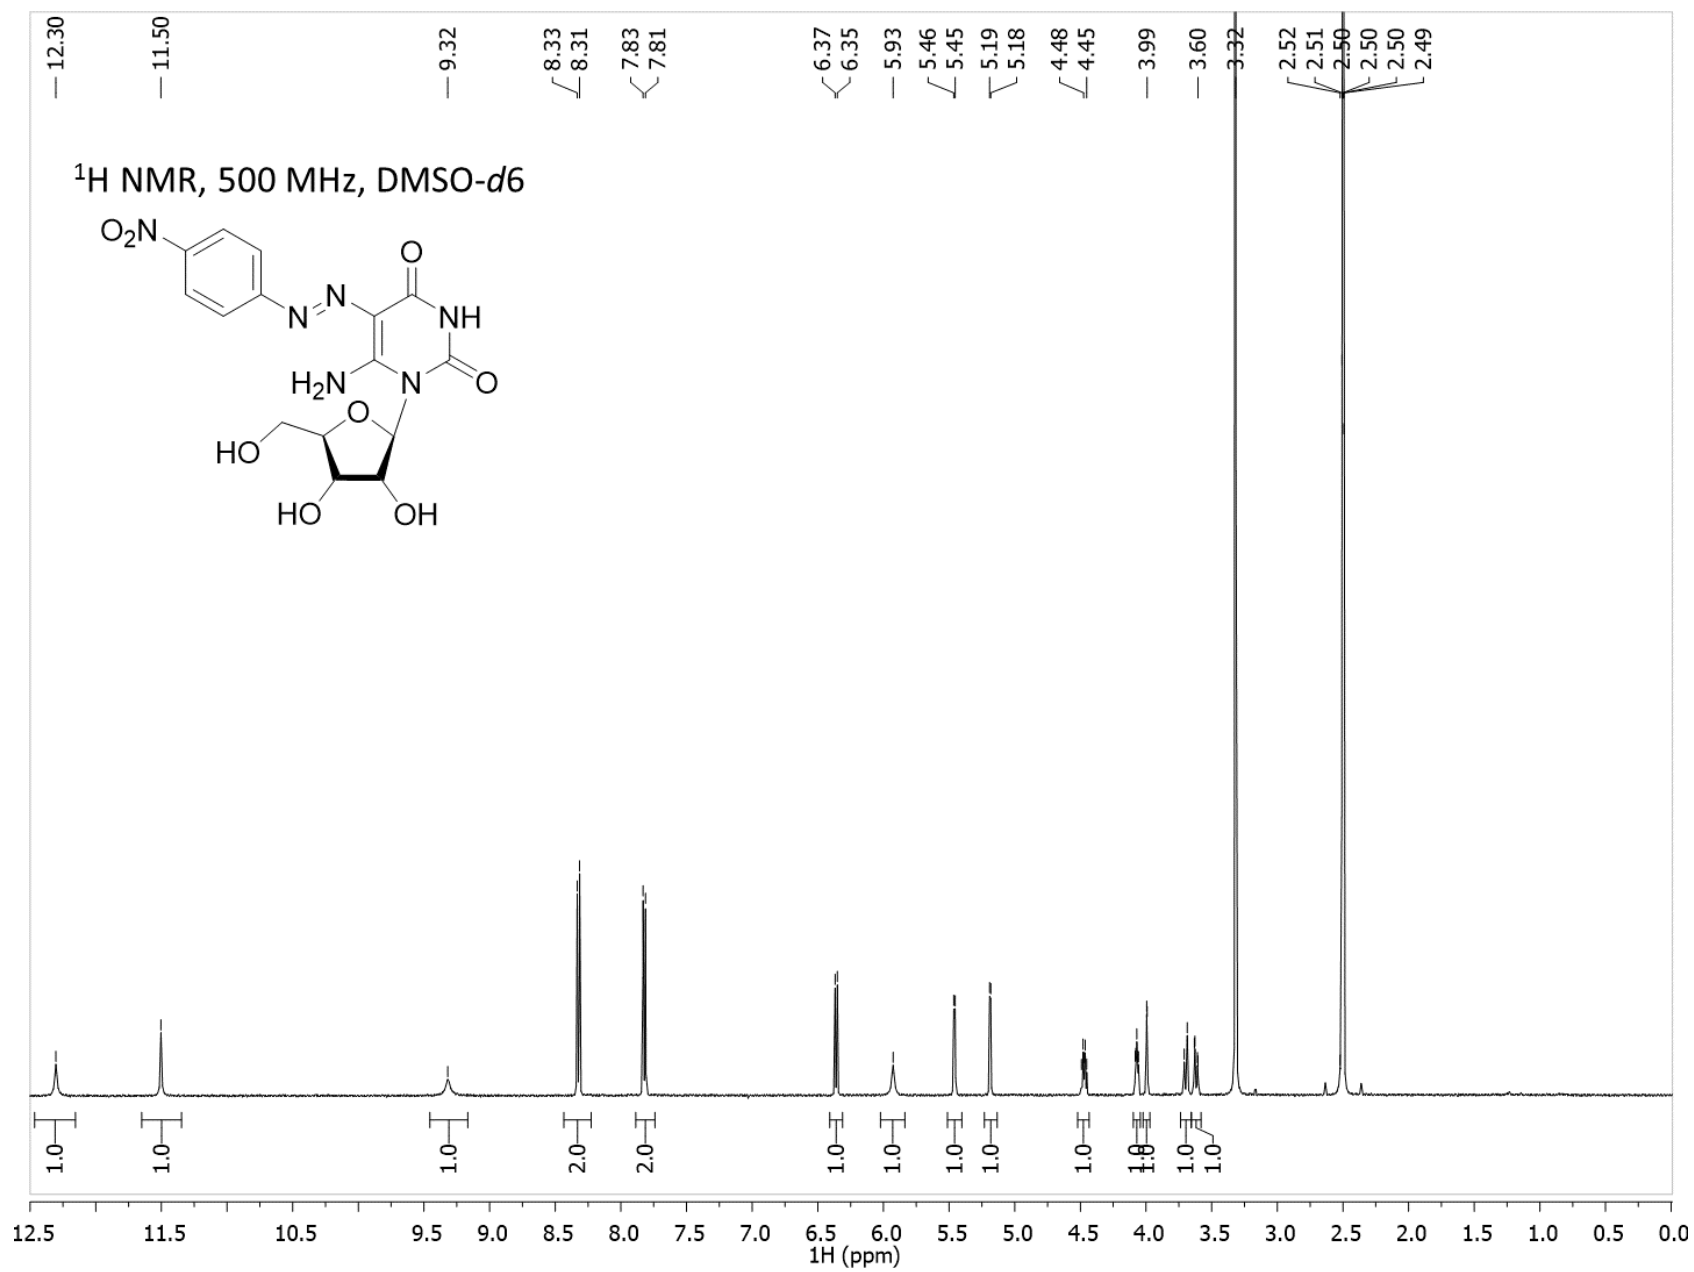

**Figure S24.** <sup>1</sup>H NMR of 6-amino-5-(4-nitrophenylazo) uridine (**5**)



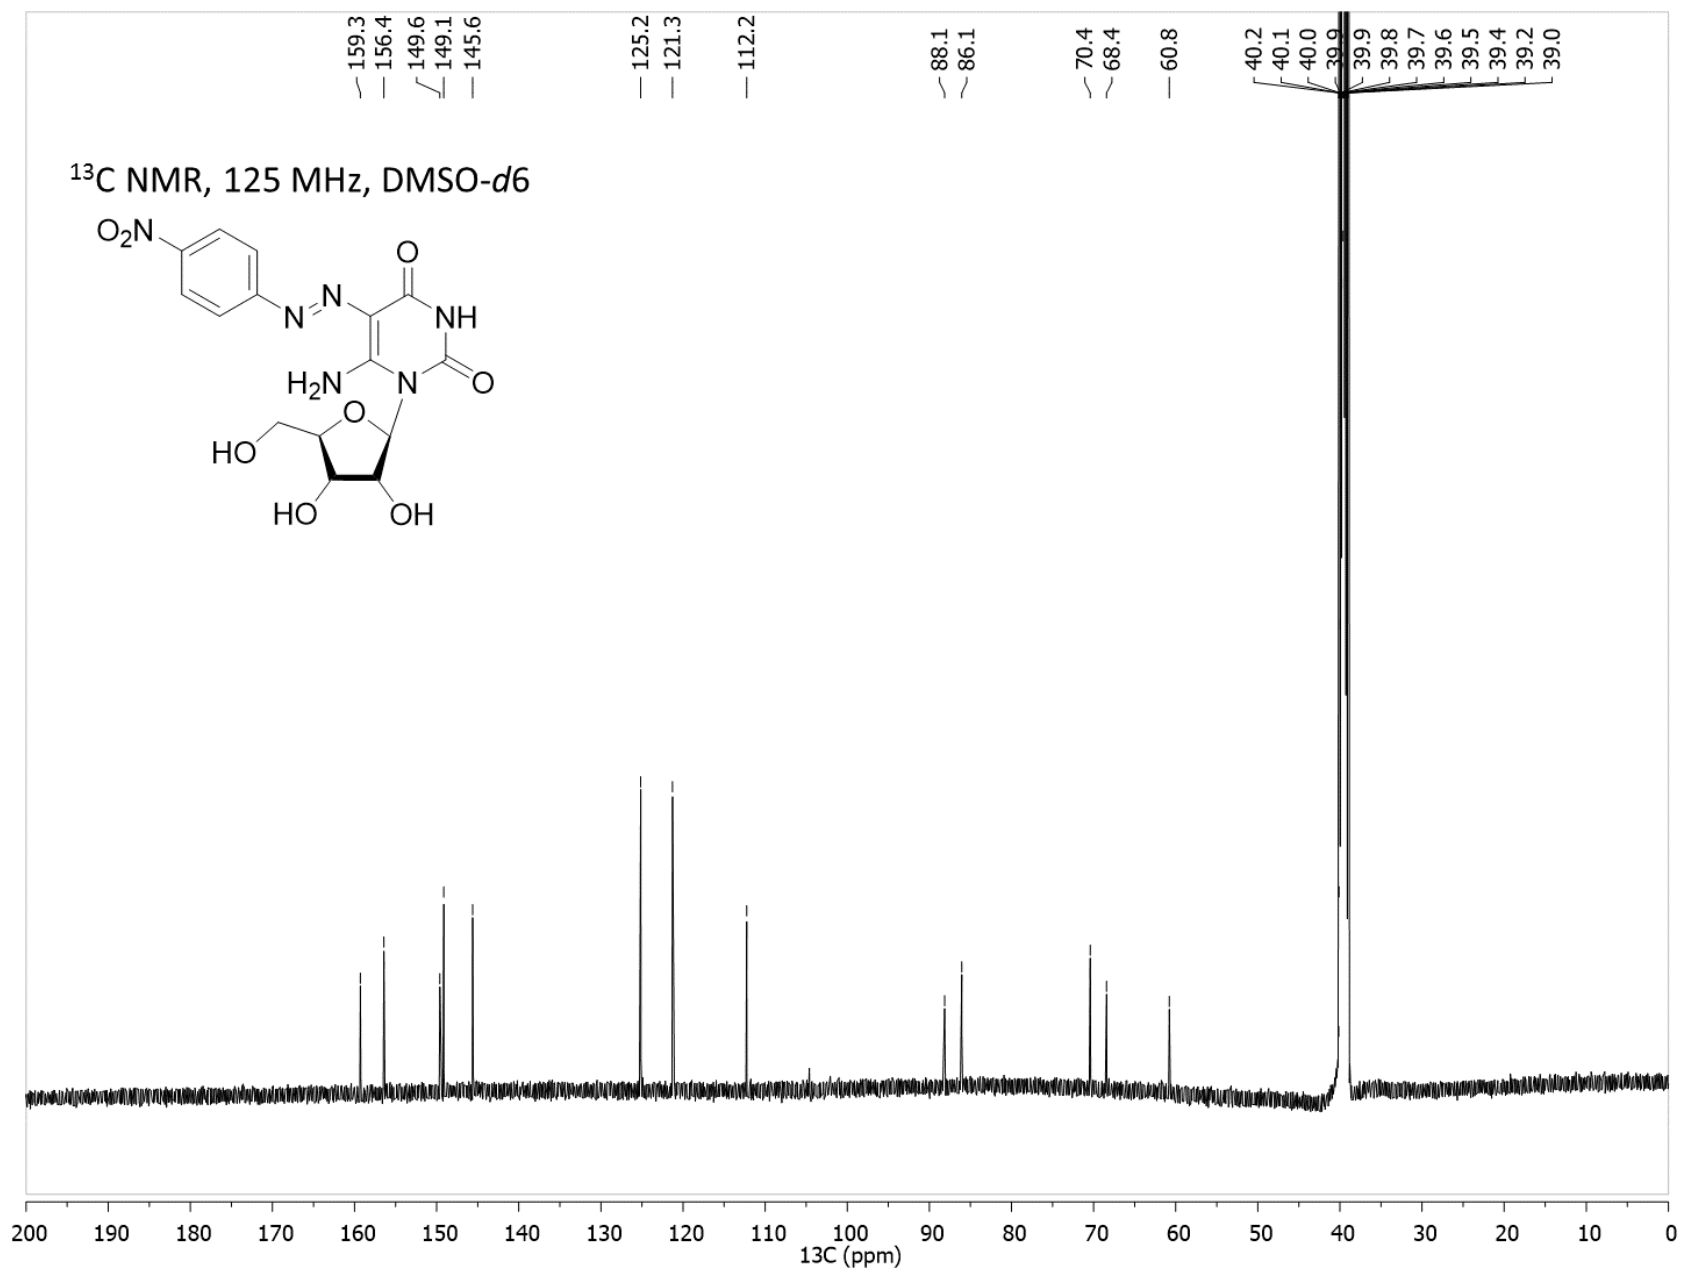

**Figure S25.** <sup>13</sup>C NMR of 6-amino-5-(4-nitrophenylazo) uridine (5)

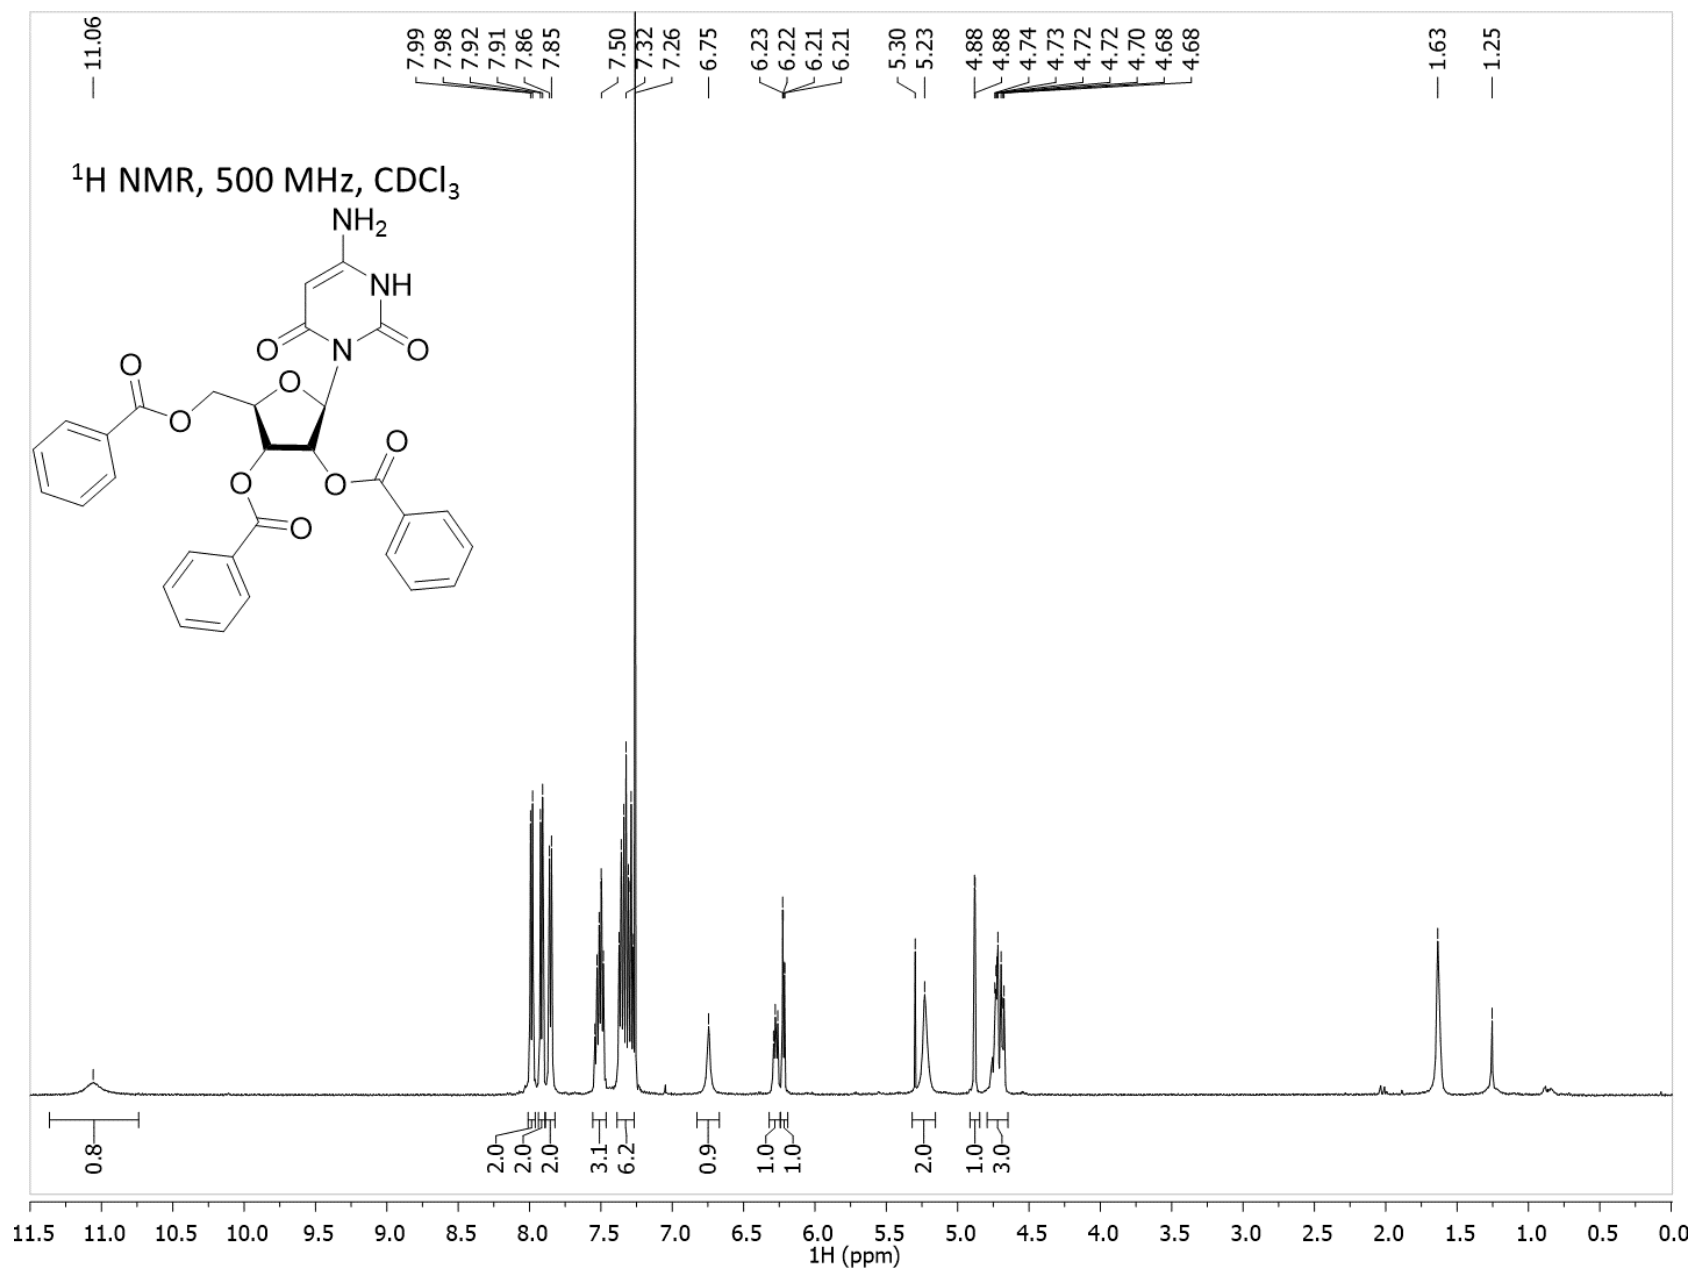

**Figure S26.** <sup>1</sup>H NMR of 2',3',5'-tri-O-benzoyl 6-oxocytidine (**6**).

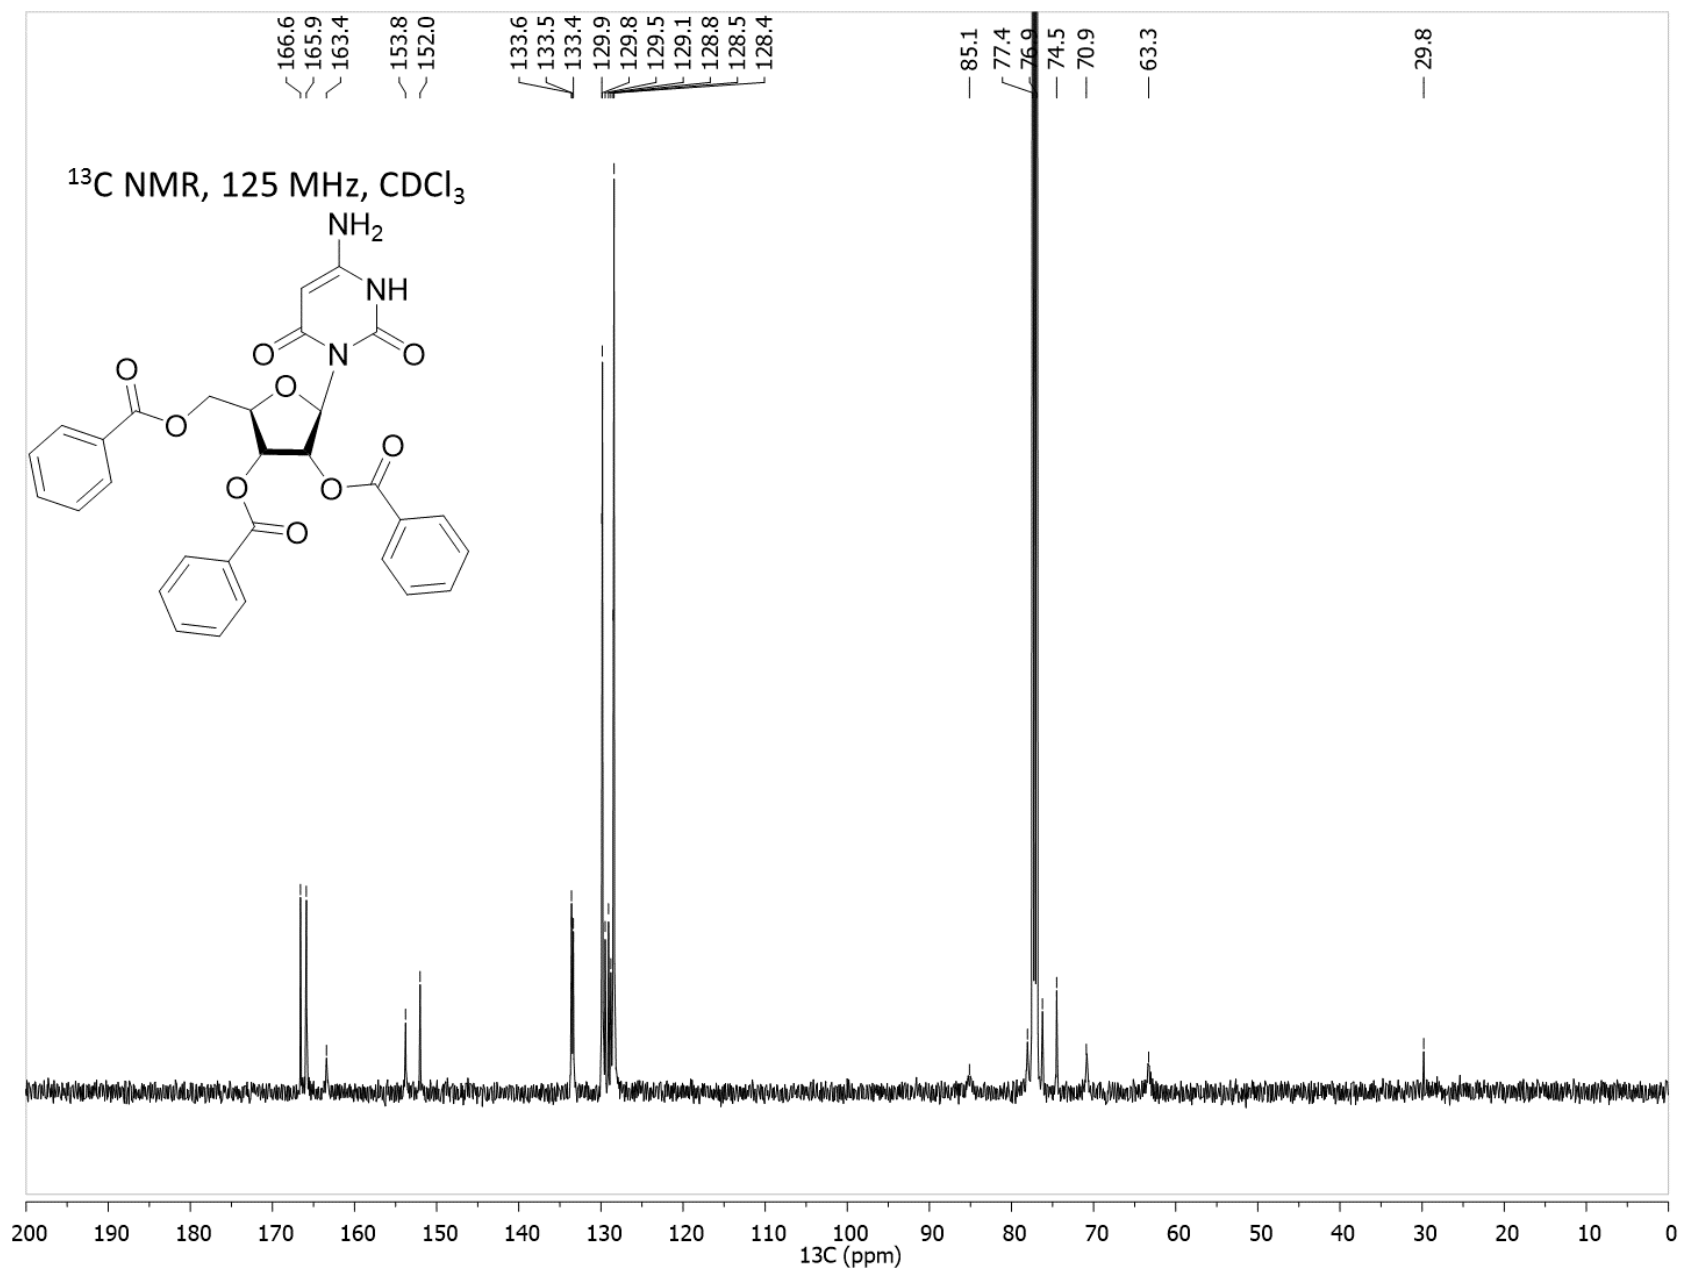

**Figure S27.** <sup>13</sup>C NMR of 2',3',5'-tri-O-benzoyl 6-oxocytidine (6).



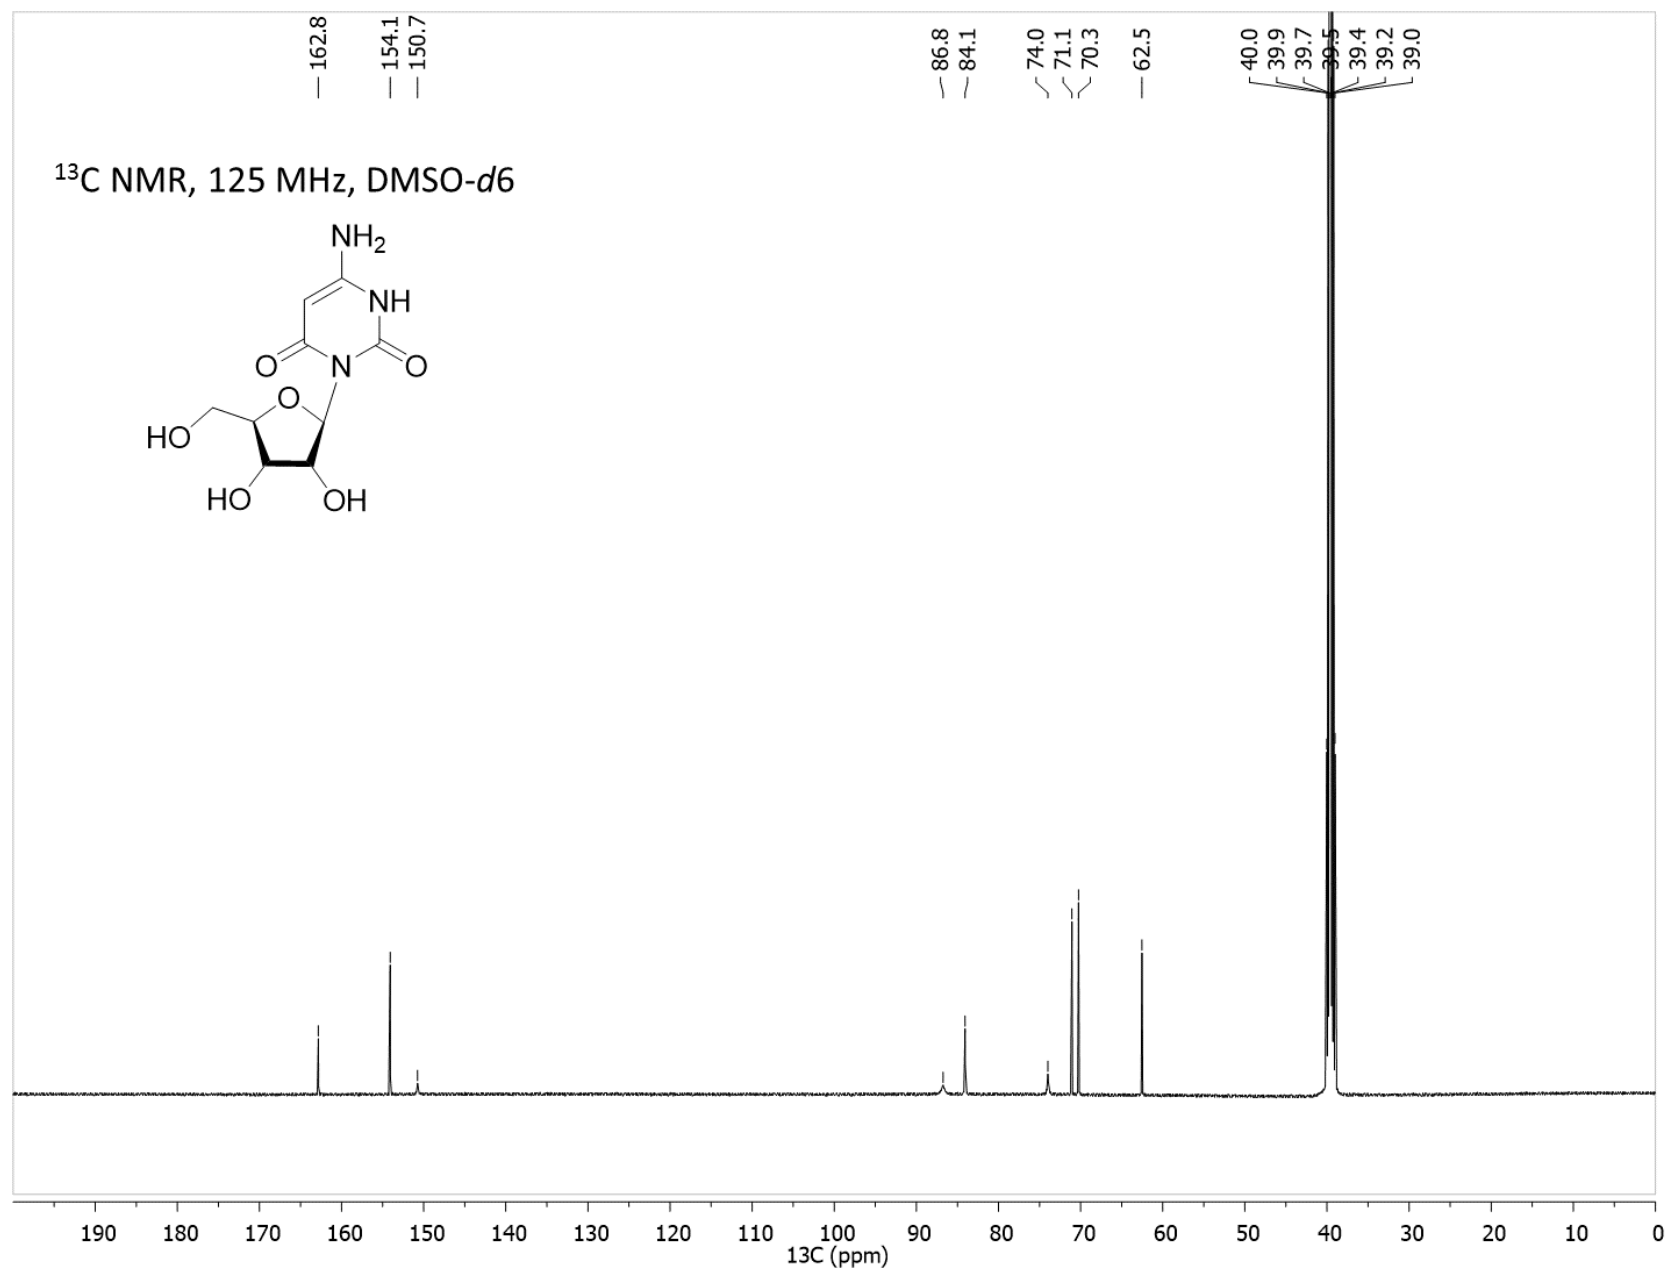

Figure S29. <sup>13</sup>C NMR of 6-oxocytidine (7)

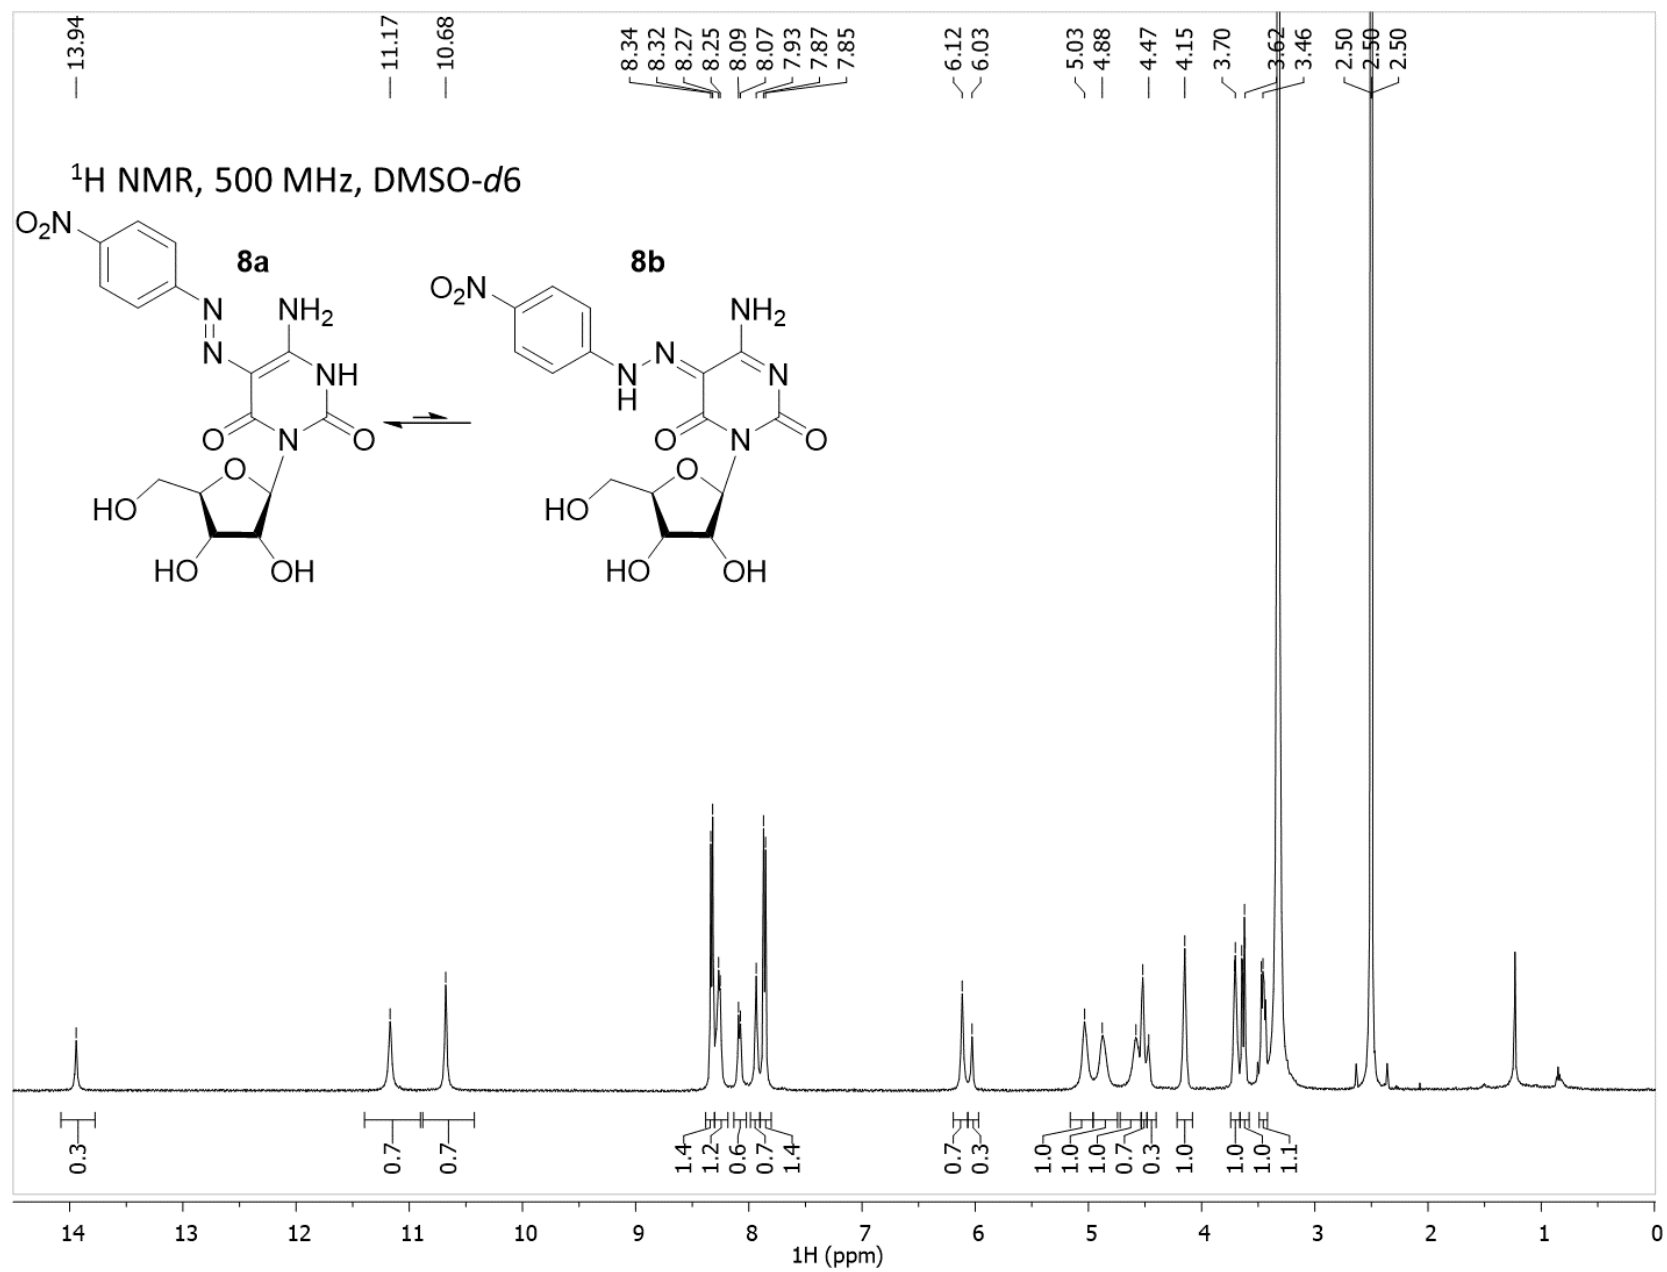

**Figure S30.** <sup>1</sup>H NMR of 5-(4-nitrophenylazo)-6-oxocytidine (**8**)

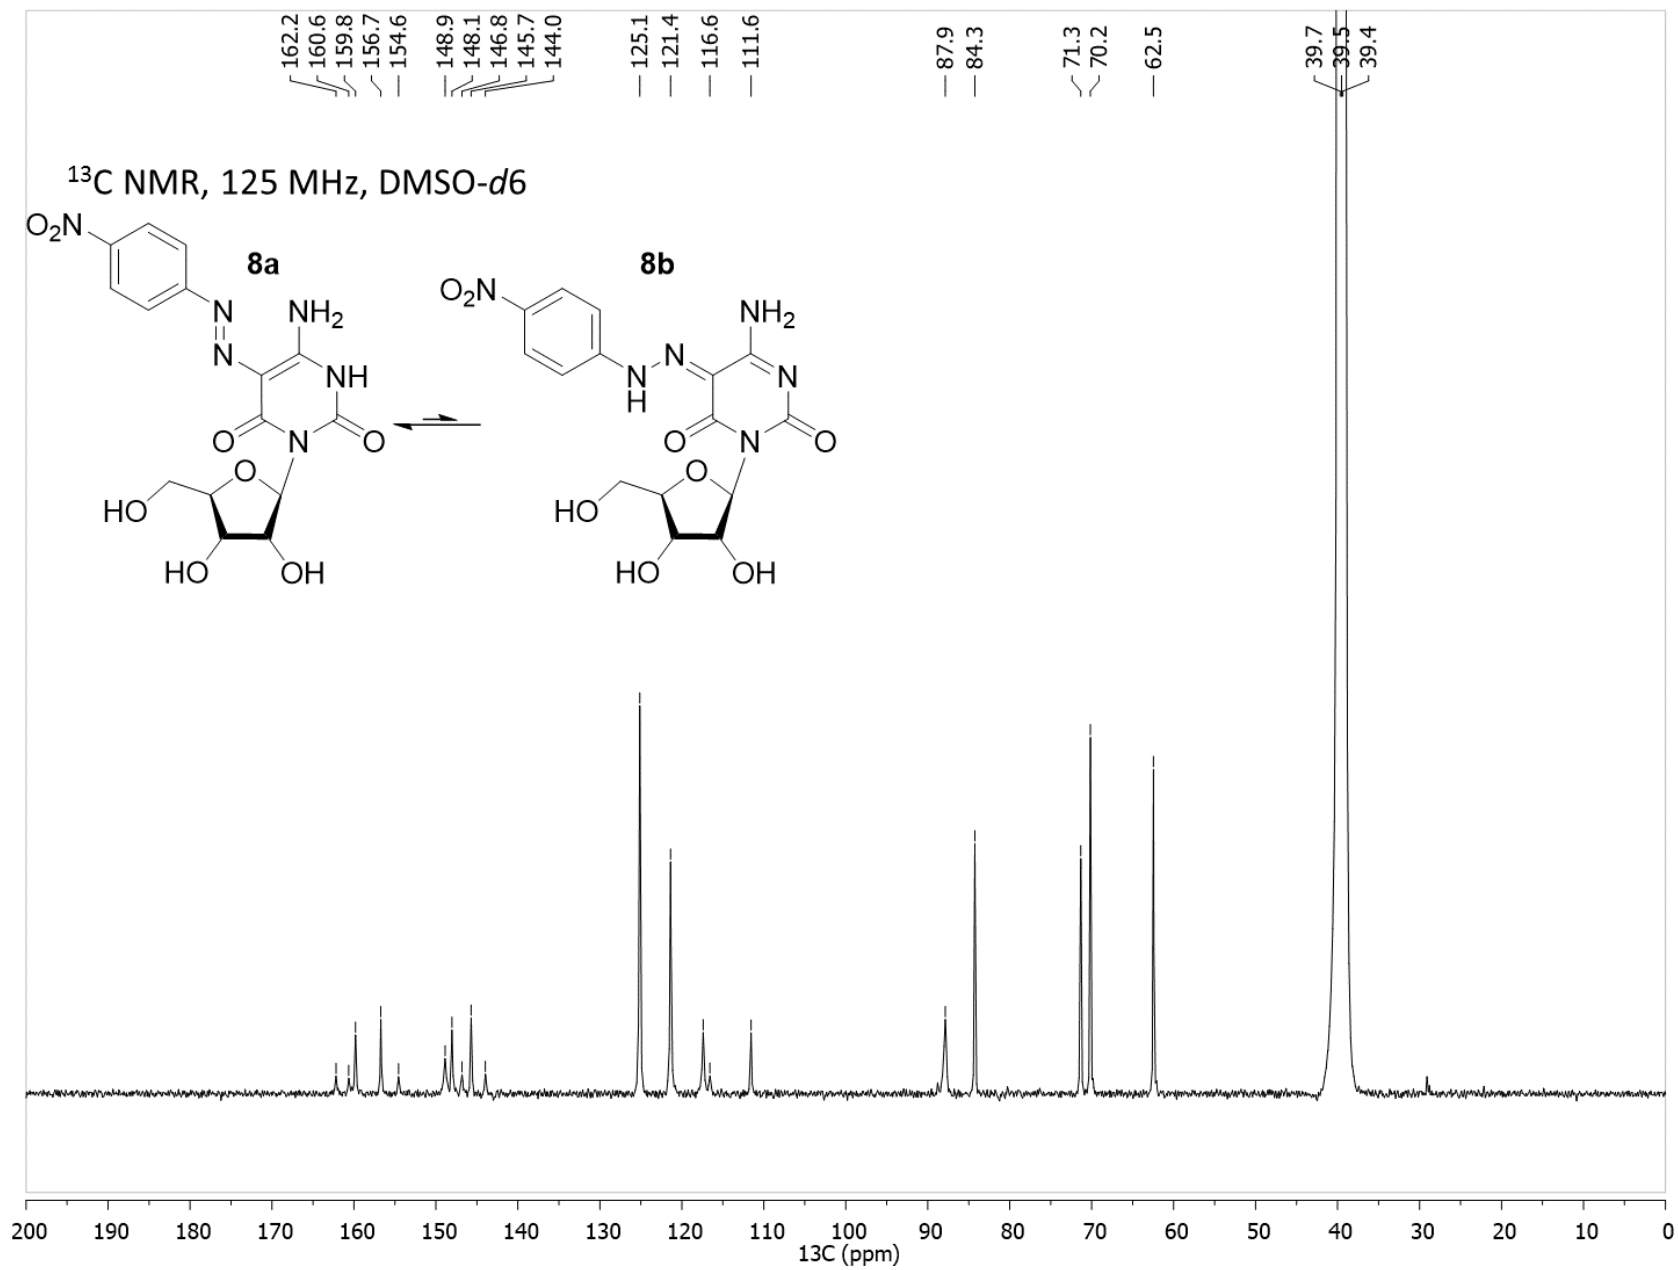

**Figure S31.** <sup>13</sup>C NMR of 5-(4-nitrophenylazo)-6-oxocytidine (**8**)

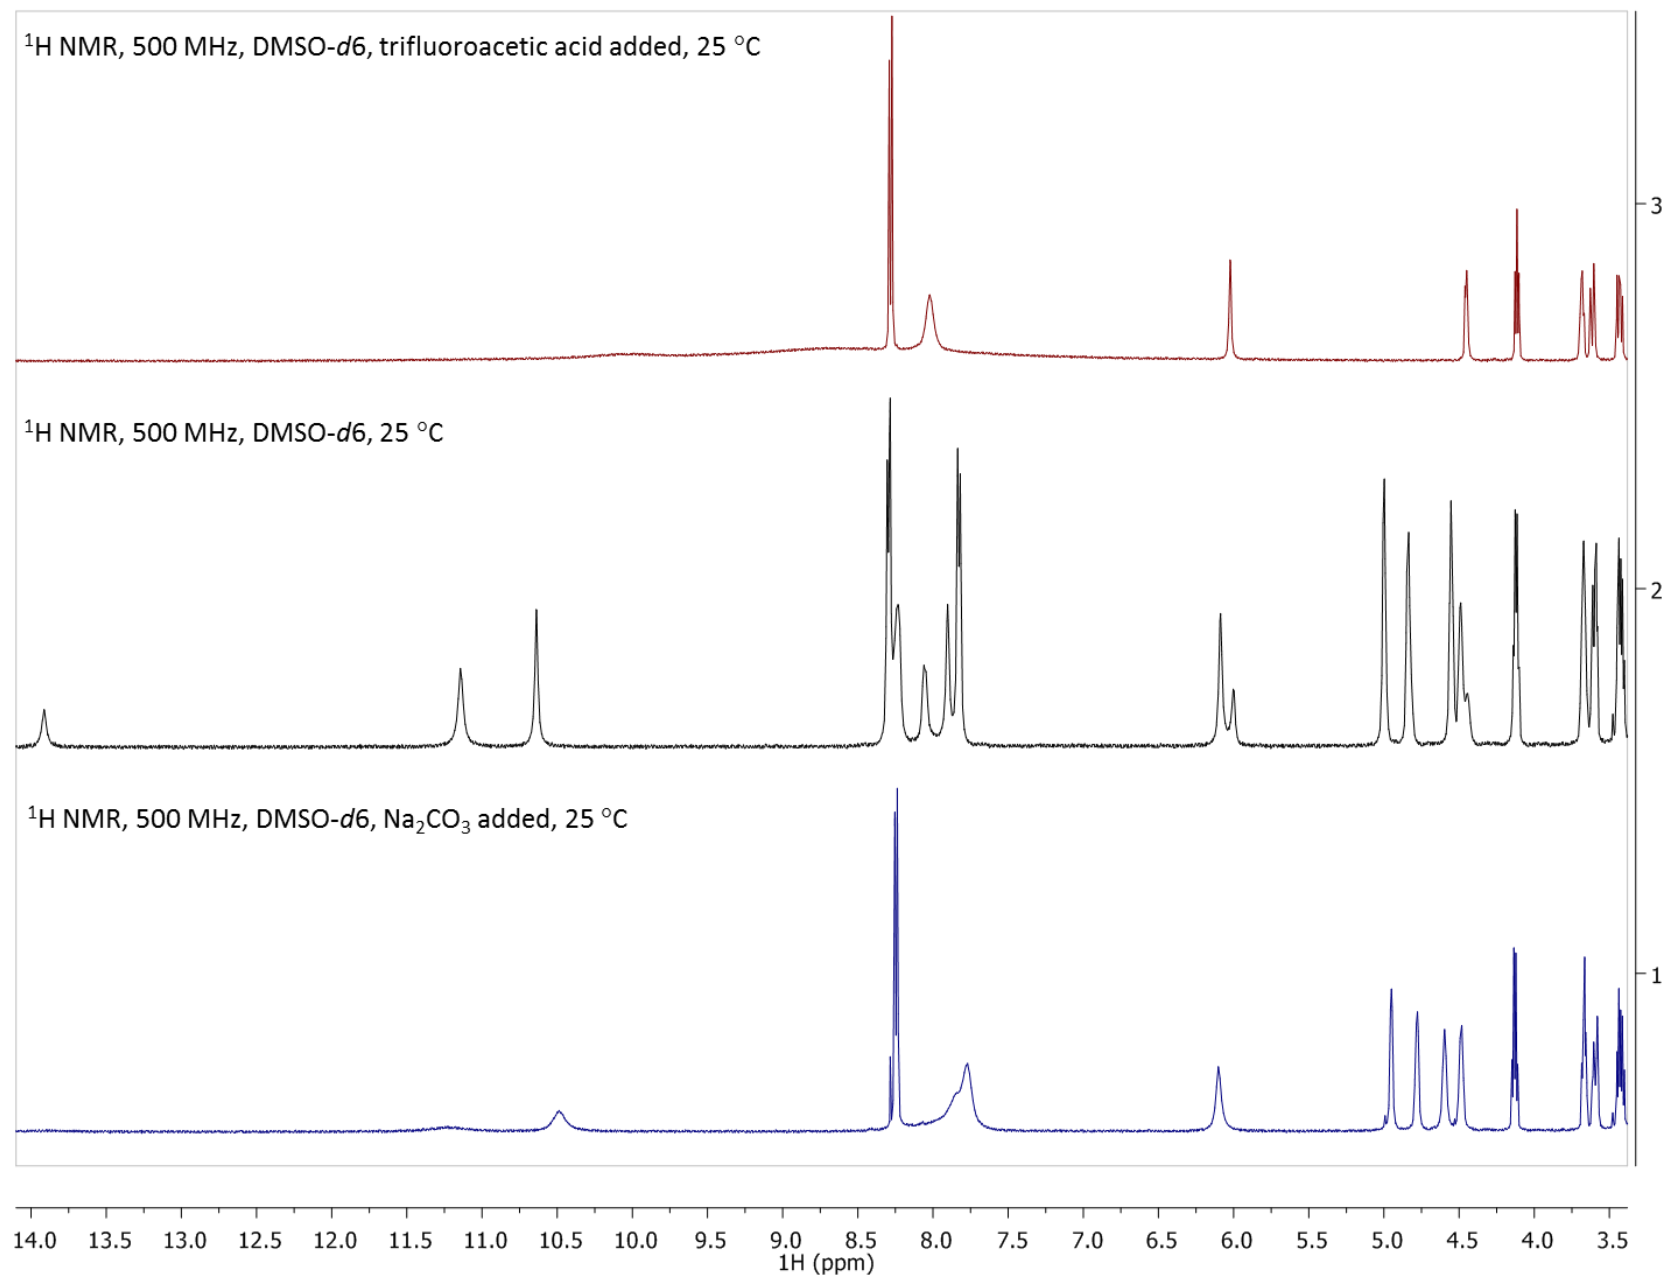

**Figure S32.**  $^1\text{H}$  NMR study of 5-(4-nitrophenylazo)-6-oxocytidine (**8**),  $25\text{ }^\circ\text{C}$



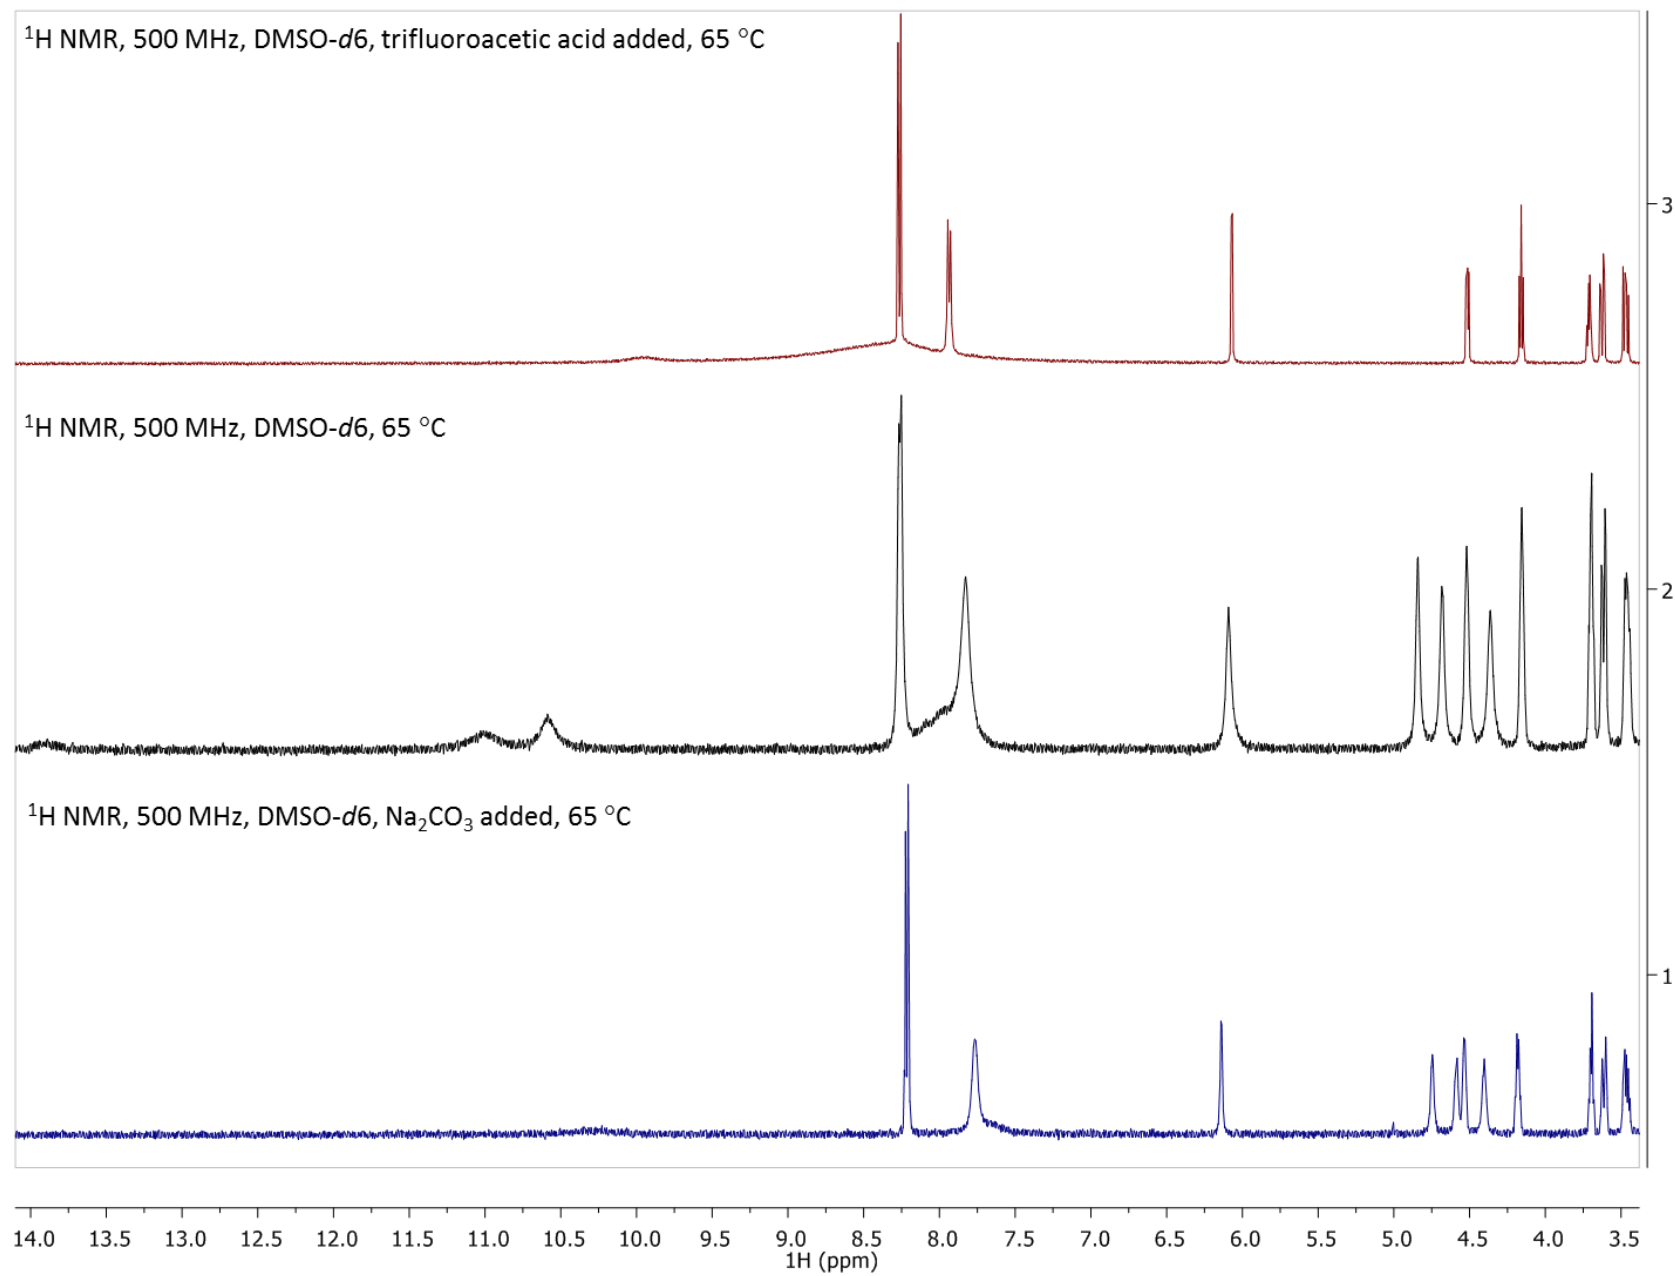

**Figure S33.** <sup>1</sup>H NMR study of 5-(4-nitrophenylazo)-6-oxocytidine (**8**), 65 °C
